## Accelerating structure-function mapping using the ViVa webtool to mine natural variation

Morgan O. Hamm<sup>1</sup>, Britney L. Moss<sup>2</sup>, Alexander R. Leydon<sup>1</sup>, Hardik P. Gala<sup>1</sup>, Amy Lanctot<sup>1</sup>, Román Ramos<sup>1</sup>, Hannah Klaeser<sup>2</sup>, Andrew C. Lemmex<sup>1</sup>, Mollye L. Zahler<sup>1</sup>, Jennifer L. Nemhauser<sup>1</sup>, R. Clay Wright<sup>3\*</sup>

<sup>1</sup>Department of Biology, University of Washington, Seattle, WA, USA.

<sup>2</sup>Department of Biology, Whitman College, Walla Walla, WA, USA.

<sup>3</sup>Biological Systems Engineering, Virginia Tech, Blacksburg, VA, USA. Previous affiliation: Department of Biology, University of Washington, Seattle, WA, USA.

\*Direct correspondence to: [wrightrc@vt.edu](mailto:wrightrc@vt.edu).

2018-12-05

Thousands of sequenced genomes are now publicly available capturing a significant amount of natural variation within plant species; yet, much of this data remains inaccessible to researchers without significant bioinformatics experience. Here, we present a webtool called ViVa (Visualizing Variation) which aims to empower any researcher to take advantage of the amazing genetic resource collected in the *Arabidopsis thaliana* 1001 Genomes Project (<http://1001genomes.org>). ViVa facilitates data mining on the gene, gene family or gene network level. To test the utility and accessibility of ViVa, we assembled a team with a range of expertise within biology and bioinformatics to analyze the natural variation within the well-studied nuclear auxin signaling pathway. Our analysis has provided further confirmation of existing knowledge and has also helped generate new hypotheses regarding this well studied pathway. These results highlight how natural variation could be used to generate and test hypotheses about less studied gene families and networks, especially when paired with biochemical and genetic characterization. ViVa is also readily extensible to databases of interspecific genetic variation in plants as well as other organisms, such as the 3,000 Rice Genomes Project (<http://snp-seek.irri.org/>) and human genetic variation (<https://www.ncbi.nlm.nih.gov/clinvar/>).

Keywords: natural variation, *Arabidopsis thaliana*, genome diversity, structure, function, genotype, phenotype, bioconductor, bookdown, r

## 1 Introduction

2 The sequencing of the first *Arabidopsis thaliana* genome ushered in a new era of tool  
3 development and systematic functional annotation of plant genes (The Arabidopsis  
4 Genome Initiative 2000). Since that landmark effort, massive scaling of sequencing  
5 technology has allowed for the survey of genomic variation in natural *Arabidopsis thaliana*  
6 populations (Nordborg et al. 2005; Borevitz et al. 2007; Weigel and Mott 2009). This  
7 valuable population genetics resource has led to several associations of genetic loci with  
8 phenotypic traits and provided insights into how selective pressure has influenced the  
9 evolution of plant genomes (Long et al. 2013; Atwell et al. 2010; Clark et al. 2007).

10 Beyond its utility in gene discovery and understanding genome evolution, natural genetic  
11 variation provides a catalog of permissible polymorphisms that can facilitate the  
12 connection of genotype to phenotype at the gene, gene family and network scales (Joly-  
13 Lopez, Flowers, and Purugganan 2016). This is an especially critical resource in large gene  
14 families where loss of function in individual genes may have little or no phenotypic effect  
15 and directed allele replacement remains time and resource-intensive. Massively parallel  
16 assays of variant effects in human clinical medicine stand to revolutionize genetic  
17 diagnostics and personalized medicine (Starita et al. 2017; Gasperini, Starita, and Shendure  
18 2016; Matreyek, Stephany, and Fowler 2017). We envision the use of plant natural  
19 variation datasets as a tool to similarly revolutionize breeding and genetic engineering of  
20 crop plants by rapidly advancing our understanding of genotype/function/phenotype  
21 relationships. A proof-of-principle survey of a relatively small subset of natural variants  
22 paired with a synthetic assay of gene function successfully mapped critical functional  
23 domains of auxin receptors and identified new alleles which affect plant phenotype (Wright  
24 et al. 2017).

25 Why is the survey of natural variants not as routine as a BLAST search or ordering T-DNA  
26 insertion mutants? One reason may be the current requirement for a fairly high level of  
27 bioinformatics expertise to extract the desired information from whole genome  
28 resequencing datasets. While existing resources such as the 1001 Proteomes website (Joshi  
29 et al. 2012) and ePlant (Waese et al. 2017) facilitate access to this data at the gene scale,  
30 they do not provide summaries or visualizations of variation at the gene family and  
31 network scales. To address this concern, we created ViVa: a webtool and R-package for  
32 **Visualizing Variation**, which allows plant molecular biologists of any level access to gene-  
33 level data from the 1001 Genomes database. Using ViVa researchers may: 1) Identify  
34 polymorphisms to facilitate biochemical assays of variant effects (Starita et al. 2017;  
35 Wright et al. 2017); 2) Produce family-wise alignments of variants to facilitate *de novo*  
36 functional domain identification (Melamed et al. 2015); 3) Generate lists of accessions  
37 containing polymorphisms to facilitate phenotypic analysis of gene variant effects (Park et  
38 al. 2017); and 4) Quantify metrics of genetic diversity to facilitate the study of gene, gene  
39 family and network evolution (Delker et al. 2010; Kliebenstein 2008).

## 1 **Results and Discussion**

### 2 **An overview of ViVa**

3 ViVa, in this first iteration, is meant to visualize natural variation in the coding sequences of  
4 genes. Non-coding sequence variation is intentionally excluded from the analysis tools. This  
5 reflects challenges both in alignment of non-coding sequences and the increased difficulty  
6 in assessing variation in these regions (Alexandre et al. 2018).

7 The development version of ViVa can be accessed as a Docker container  
8 <https://hub.docker.com/r/wrightrc/r1001genomes/> or as an R-package at  
9 <https://github.com/wrightrc/r1001genomes>. ViVa will be hosted at  
10 <https://www.plantsynbiolab.bse.vt.edu/ViVa/> upon release.



1 *map colored according to the selected set of SNPs. (e) The SNP Browser tab allows variants*  
2 *and accessions to be filtered by any combination of text and numeric fields. (f) The Alignments*  
3 *tab aligns DNA and amino acid sequences of homologous genes, and colors sequence elements*  
4 *based on SNPs and annotations.*

## 5 **Gene Select and Annotation Files**

6 At the top of the ViVa webtool are two collapsible panels used for entering the genes to  
7 query and custom annotations for those genes (Figure 1a). The Gene Select panel permits  
8 gene input by either typing in the genes' AGI/TAIR locus identifiers, or uploading a .csv file.  
9 The Annotation Files panel is optionally used to upload an annotation file containing  
10 coordinates of domains, mutations, or any other sequence knowledge that will be plotted  
11 on some of the tabs of the webtools analysis section.

12 Below the data input section, the rest of the webtool is divided into several tabs containing  
13 the interactive output of the program.

## 14 **SNP Stats: Summary of gene information, structure, and diversity**

15 The SNP Stats tab provides general information on the gene transcripts being queried, as  
16 well as calculated counts/statistics on the content of variants found in the sample  
17 population (Figure 1b). The first table of this section is basic information about the  
18 transcripts, including TAIR locus and symbol, the chromosomal start and end position and  
19 the transcript length. This information was collected from the Araport11 Official Release  
20 (06/2016) annotation dataset (Cheng et al. 2017).

21 The next two tables provide counts of SNPs across the gene body for each transcript. The  
22 Total Polymorphism Counts table provides the total number of observations of non-  
23 reference allele counts of each variant type (the Col-0 accession TAIR9 genome is the  
24 reference genome for this dataset). The Unique Allele Count table only counts the number  
25 of unique variants and alleles within the population of accessions (*e.g.* if multiple  
26 accessions have the same variant allele, that allele will only be counted once).

27 The Nucleotide Diversity Statistics table provides a nucleotide diversity statistic ( $\pi$ ) for the  
28 transcript and the coding sequence of each gene (Nei and Li 1979). Nucleotide diversity is  
29 also calculated for the set of only synonymous ( $\pi_S$ ) and only non-synonymous sites ( $\pi_N$ ).  
30 The ratio of the presence of non-synonymous to synonymous polymorphism provides a  
31 measure of the potential for functional diversity (Firnberg and Ostermeier 2013;  
32 Whitehead et al. 2012). We present  $\pi_N/\pi_S$  here as an correlate for functional diversity  
33 throughout ViVa (Nelson, Moncla, and Hughes 2015; Hughes et al. 2000). While imperfect,  
34 this metric may be suggestive of functional constraint when  $\pi_N/\pi_S \ll 1$  and functional  
35 diversity when  $\pi_N/\pi_S \gg 1$  (Hughes 1999).

## 36 **Diversity plot: Visualize allelic diversity across the coding sequence**

37 The Diversity Plot tab shows the nucleotide diversity of each variant in the coding region of  
38 a selected gene (Figure 1c). Although the X-axis is marked by codon number from the N-  
39 terminus for interpretability, the diversity values are based on single nucleotide sites. The

1 colors of markers on the plot identify the effect of the polymorphism. If annotation files are  
2 provided, the background of the plot will be color coded by the annotated regions. If points  
3 on the plot are selected by clicking and dragging a box over them, the data for the selected  
4 points will appear in the grey box below the plot. Below this is a complete data table  
5 containing all points on the plot which can be downloaded as a .csv file. This tab allows  
6 users to identify regions of high diversity as well as isolate polymorphisms that may affect  
7 gene function and exist in multiple accessions, facilitating phenotypic analysis.

## 8 **SNP Mapping: View distributions of SNPs across the globe**

9 The SNP Mapping tab plots the accessions collection locations on a world map, and colors  
10 the points based on selected variant alleles (Figure 1d). After selecting the genes and  
11 filtering on the SNP type and level of nucleotide diversity, a group of checkboxes becomes  
12 available to select variant alleles to display on the map. The variant alleles are labeled with  
13 the Transcript\_ID and Amino\_Acid\_Change fields, in the form  
14 [Transcript\_ID|Amino\_Acid\_Change]. After selecting the variant alleles and updating the  
15 map, the accessions on the map will be colored by each present unique combination of the  
16 selected alleles. Below the map is a table containing the accession details for all mapped  
17 accessions. This tab may help users formulate hypotheses about the relatedness of  
18 accessions sharing a common allele and environments in which that allele may be  
19 favorable.

## 20 **SNP Browser: Filter and search for variants**

21 The SNP Browser tab provides a way to search and filter the variant data by different fields  
22 (Figure 1e). After selecting the transcripts to include, a number of filters can be applied to  
23 the dataset to match text values (e.g. gene name or variant effect), or set minimum and  
24 maximum limits on the values of numeric fields (e.g. nucleotide diversity). When these  
25 filters are applied, the table below will update to only contain rows meeting the criteria for  
26 all filters. This tab can be useful for identifying all accessions with a particular SNP allele, or  
27 any non-reference alleles in a particular region of a gene that may not have been easily  
28 accessible in another tab.

## 29 **Alignments: Visualize SNPs on alignments of homologous genes**

30 The Alignments tab provides DNA and amino acid sequence alignments of selected genes,  
31 colored according to the variant allele with the strongest functional effect at each position  
32 (Figure 1f and 2). The content of this tab is most useful if the selected genes are all family  
33 members or have significant sequence homology. If annotation files are uploaded, the  
34 background of the sequences will be colored by annotation region. Hovering the cursor  
35 over variants will provide additional details about the alleles present at that locus. This tab  
36 facilitates family-wise analysis of functional conservation, allowing users to identify  
37 potential functional regions and alleles which may be useful in deciphering this function.

## 1 **Gene Tree: Visualize functional diversity and sequence divergence of a gene** 2 **family**

3 The Gene Tree tab provides a neighbor joining tree (or uploaded tree created by the user)  
4 for the selected genes with the tips of the tree mapped with predicted functional diversity  
5 as represented by  $\pi_N/\pi_S$  in the 1001 Genomes dataset (Figure 3). This tab allows users to  
6 generate hypotheses regarding functional diversity and redundancy within the context of  
7 the predicted evolution of the gene family.

## 8 **ViVa R package: Programmatic access to ViVa's functionality**

9 All of the functionalities of the ViVa webtool are implemented through function calls to the  
10 ViVa R package. In addition to being able to generate the same sets of figures and tables as  
11 in the webtool, users of the R package also gain direct access to the underlying data  
12 structures, providing greater control over parameters when processing and visualizing the  
13 data. The ViVa R package can be found at <https://github.com/wrightrc/r1001genomes> and  
14 can be installed in your R environment via the devtools package:  
15 `devtools::install_github("wrightrc/r1001genomes")`.

## 16 **Visualizing Variation within the auxin signaling pathway**

17 To test the usability and accessibility of ViVa, we assembled a group of alpha testers  
18 comprising postdoctoral, graduate, and undergraduate researchers at a research university  
19 (University of Washington) and at a primarily-undergraduate institution (Whitman  
20 College). Our testers focused their investigation of natural variation on the nuclear auxin  
21 signaling pathway. We selected this signaling pathway for multiple reasons including a  
22 wealth of functional data and solved structures of several domains or entire proteins. Using  
23 this existing knowledge, we were able to qualitatively assess the predictive ability of the  
24 ViVa modules. Summary information about each nuclear auxin signaling gene family  
25 examined can be found in the [Supplemental Data](#). Below, we describe the results for the  
26 *Aux/IAA* family in more detail.

27 In most cases, natural selection is expected to minimize the persistence of nonsynonymous  
28 mutations in sequences that encode critical functional domains relative to their persistence  
29 in non-critical domains (Hughes et al. 2000). Therefore, we reasoned that scanning gene  
30 coding sequences for regions of relatively low nonsynonymous diversity should highlight  
31 functional domains. This general principle can be seen clearly in the analysis of the *Aux/IAA*  
32 family of transcriptional co-repressors/co-receptors. *Aux/IAAs* have three major domains.  
33 Domain I contains an EAR motif that facilitates interaction with TOPLESS (TPL) and  
34 TOPLESS-related (TPR) transcriptional repressors (Tiwari, Hagen, and Guilfoyle 2004;  
35 Szemenyei, Hannon, and Long 2008). Domain II, the degron, facilitates interactions with the  
36 TIR1/AFB receptors in the presence of auxin (Tan et al. 2007). Domain III (which was  
37 originally considered domains III and IV) is a PB1 domain and facilitates interactions with  
38 the ARF transcription factors (Ulmasov et al. 1997; Guilfoyle and Hagen 2012; Nanao et al.  
39 2014; Korasick et al. 2014). The EAR motif and degron can be readily identified by the drop  
40 in nonsynonymous variation, as visualized by the lack of stronger functional effects in  
41 Figure 2. The PB1 domain is not as readily identified, perhaps because the multiple

- 1 contributing residues are spread out in linear sequence space. It is worth noting that the
- 2 charged residues that facilitate electrostatic PB1-PB1 interaction show little variation.

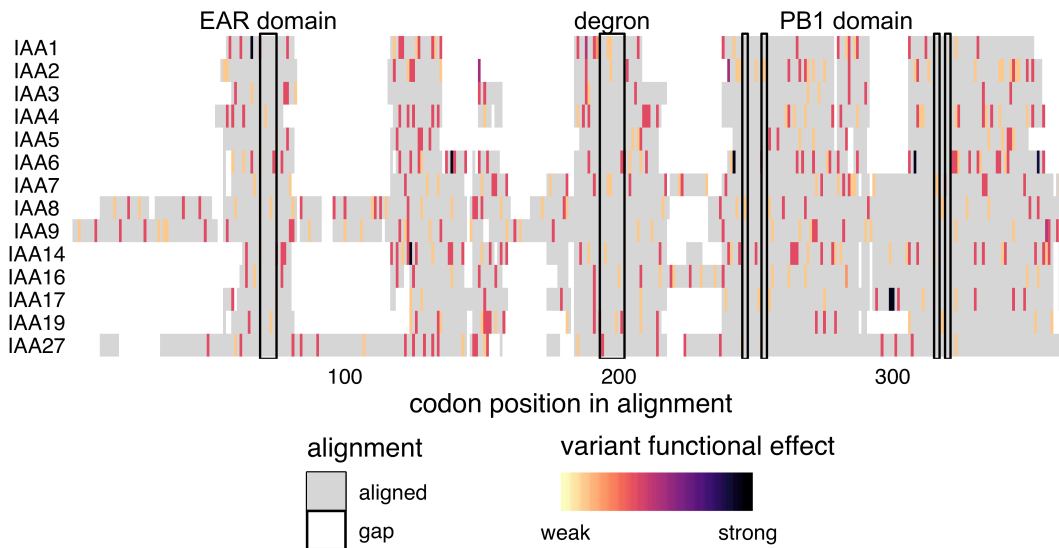

- 3
- 4 **Figure 2 Canonical Aux/IAAs have conserved Degron and EAR motifs.** Protein sequences
- 5 were aligned with DECIPHER (Wright 2015) and variants were mapped to this alignment and
- 6 colored according to the predicted functional effect of the allele of strongest effect at that
- 7 position, with light colors having weaker effects on function and darker colors stronger
- 8 effects. Red indicates missense variants. Color scale is explained in Methods.

9 Natural variation also provides a means to study how gene families are evolving. To do this,

10 we used ViVa to map onto the Aux/IAA phylogenetic tree the diversity at nonsynonymous

11 variant sites relative to synonymous sites (Figure 3). This visualization enables

12 straightforward comparison of rates of recent functional divergence within the context of

13 rates of sequence divergence across the entire gene family. By comparing nonsynonymous

14 diversity gene clades can be identified that are likely to exhibit high rates of functional

15 conservation and possible redundancy or conversely, where there is a possibility for recent

16 emergent novel function or pseudogenization.

17 Previous research has found evidence of both broad genetic redundancy among the

18 *Aux/IAAs* and also specificity within closely related pairs or groups of *Aux/IAA* proteins

19 (Overvoorde et al. 2005; Winkler et al. 2017). For example, the *iaa8-1 iaa9-1* double mutant

20 and the *iaa5-1 iaa6-1 iaa19-1* triple mutant have wild-type phenotypes (Overvoorde et al.

21 2005), yet the *IAA6/IAA19* sister pair has significant differences in expression patterns,

22 protein abundances and functions suggesting they have undergone functional

23 specialization since their divergence (Winkler et al. 2017). A closer examination of the

24 *IAA19* and *IAA6* pair within *Brassicaceae* found evidence for positive selection and possible

25 subfunctionalization of *IAA6* relative to *IAA19* (Winkler et al. 2017). Consistent with these

26 results, ViVa revealed higher conservation for *IAA19* ( $\pi_N/\pi_S = 0.55$ ) compared to *IAA6*

27 ( $\pi_N/\pi_S = 2.3$ ) (Figure 3), and also detected high nonsynonymous diversity within the same



1 regions of *IAA6* as seen by Winkler et al. (Figure 8). This pattern—one sister showing high  
 2 nonsynonymous diversity while the other sister was more conserved—was observed  
 3 frequently across the *Aux/IAA* as well as the *AFB* and *ARF* families (Figure 5 and 11),  
 4 suggesting this could be a recurring feature in the evolution of these families supporting  
 5 the large diversity in auxin functions.

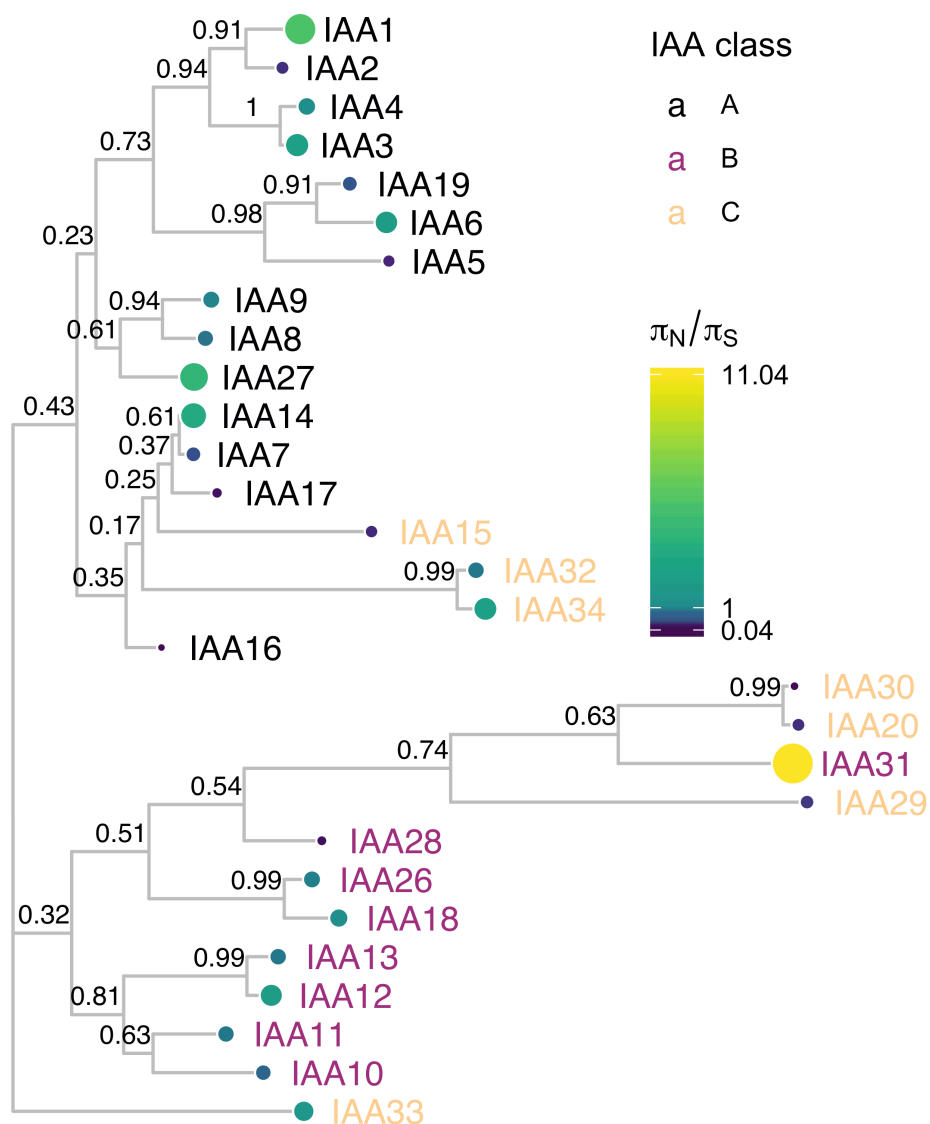

6  
 7 **Figure 3 IAA protein sequence tree mapped with  $\pi_N/\pi_S$ .** Protein sequences were aligned  
 8 with DECIPHER (Wright 2015) and low information content regions were masked (Kück et al.  
 9 2010) prior to inferring a phylogeny (Ronquist and Huelsenbeck 2003). Tips of the tree are  
 10 mapped with circles of color and diameter proportional to  $\pi_N/\pi_S$ .  $\pi_N/\pi_S$  provides a  
 11 prediction of functional diversity. Nodes are labeled with the posterior probability of monophyly.

1 *There are two distinct clades of Aux/IAAs represented by the majority of the A and B classes. C*  
2 *class Aux/IAAs are missing one or more of the canonical Aux/IAA domains.*

3 The *Aux/IAA* phylogeny clusters into two distinct clades represented by the A and B classes  
4 (Remington et al. 2004). The C class *Aux/IAAs* are missing one or more of the canonical  
5 *Aux/IAA* domains. We found notable exceptions to pattern of diversification and  
6 conservation between sister pairs within the Class B *Aux/IAA* genes. The *IAA10/IAA11*,  
7 *IAA18/IAA26*, and *IAA20/IAA30* pairs showed similar levels of nonsynonymous diversity.  
8 For example, *IAA10* and *IAA11* both showed functional conservation ( $\pi_N/\pi_S$  of 0.80 and  
9 0.67 respectively). In support of this strong conservation of both *IAA10* and *IAA11*, the  
10 *Arabidopsis thaliana* ePlant browser indicates that *IAA10* and *IAA11* have almost identical  
11 expression patterns (Waese et al. 2017). Together this evidence suggests a strong dosage  
12 requirement for these genes or that they have taken on novel functions since their  
13 emergence.

## 14 Conclusion

15 ViVa has allowed our team of testers from various skill levels and backgrounds to  
16 meaningfully access the 1001 genomes dataset. The visualizations of natural variation  
17 further supported much of the existing structure-function knowledge of this well studied  
18 signaling pathway and facilitated the generation of new hypotheses. Application of ViVa to  
19 less studied genes and gene families promises to yield more novel hypotheses, which can  
20 be evaluated with mutagenesis and functional assays to glean novel structure/function  
21 knowledge from this rich dataset.

22 ViVa results are intended to inform and inspire hypothesis generation, not be taken as  
23 absolute evidence of trends in gene or gene family evolution. Among the cautions worth  
24 noting in interpreting results are limitations of short-read sequencing that lead to regions  
25 of missing data where low read quality may have prevented variant calls. We have assumed  
26 these missing variants are reference alleles, leading to undercounting in ViVa's diversity  
27 estimations. Recent advances in sequencing technologies have been combined to generate  
28 extremely high quality genomes (Michael et al. 2018), and will reduce this source of  
29 uncertainty in future resequencing datasets. Another limitation is that the geographic  
30 coverage of accessions in the 1001 Genomes dataset is far from uniform, and thus diversity  
31 scores may not accurately reflect the allelic distributions of the global *Arabidopsis thaliana*  
32 population.

33 We hope that ViVa will advance understanding of genotype-phenotype relationships by  
34 allowing all researchers access to large resequencing datasets. In the future, we intend to  
35 expand ViVa beyond the plant genetics workhorse, *Arabidopsis thaliana*, to more  
36 agriculturally relevant species with existing resequencing projects, such as rice (Wang et al.  
37 2018) and soybean (Zhou et al. 2015). Indeed, the ViVa framework is readily adaptable to  
38 any source of targeted resequencing data. If François Jacob's metaphor holds true, and  
39 evolution is indeed a tinkerer and not an engineer (Jacob 1977), it is only by examining the  
40 largest possible number of nature's solutions that we may eventually decipher the  
41 principles constraining innovations in form and function.

## 1 **Methods**

## 2 **Data Sources**

### 3 **Variant Data**

4 Variant data was queried from the 1001 genomes project (<http://1001genomes.org>) via  
5 URL requests to their API service (<http://tools.1001genomes.org/api/index.html>). These  
6 queries returned subsets of the whole-genome variant call format (VCF) file as SnpEFF VCF  
7 files. The whole-genome VCF file can be found on the project's website at  
8 <http://1001genomes.org/data/GMI-MPI/releases/v3.1/>.

### 9 **Germplasm Accession Information**

10 A dataset of each of the 1135 accessions including CS stock numbers and geographic  
11 location where the samples were collected was retrieved from the 1001 Genomes website  
12 at <http://1001genomes.org/accessions.html>, via the download link at the bottom of the  
13 page. This data file has been embedded in the R package as `accessions`.

### 14 **Gene and Transcript Accession Information**

15 Information on the genes and transcripts including chromosomal coordinates, start and  
16 end location, and transcript length were pulled from Araport11 (Cheng et al. 2017). The  
17 TAIR10 database, found at <http://arabidopsis.org>, was accessed via the `biomart` function,  
18 using the `biomaRt` R-package. The Araport11 full genome general feature format file, which  
19 can also be found on the TAIR website ([https://www.arabidopsis.org/download/index-  
20 auto.jsp?dir=%2Fdownload\\_files%2FGenes%2FAraport11\\_genome\\_release](https://www.arabidopsis.org/download/index-auto.jsp?dir=%2Fdownload_files%2FGenes%2FAraport11_genome_release)), has been  
21 embedded in the R-package as `GRanges` object, `gr`. Gene identifiers used in this study are in  
22 Table 1.

23 *Table 1 Full list of genes used in this study, by identifier, symbol and classification.*

| <u>Arabidopsis AGI locus identifier</u> | <u>Gene symbol</u> | <u>Clade/class</u> |
|-----------------------------------------|--------------------|--------------------|
| AT3G62980                               | TIR1               | NA                 |
| AT4G03190                               | AFB1               | NA                 |
| AT3G26810                               | AFB2               | NA                 |
| AT1G12820                               | AFB3               | NA                 |
| AT4G24390                               | AFB4               | NA                 |
| AT5G49980                               | AFB5               | NA                 |
| AT2G39940                               | COI1               | NA                 |
| AT4G14560                               | IAA1               | A                  |
| AT3G23030                               | IAA2               | A                  |
| AT1G04240                               | IAA3               | A                  |
| AT5G43700                               | IAA4               | A                  |

|           |       |    |
|-----------|-------|----|
| AT1G15580 | IAA5  | A  |
| AT1G52830 | IAA6  | A  |
| AT3G23050 | IAA7  | A  |
| AT2G22670 | IAA8  | A  |
| AT5G65670 | IAA9  | A  |
| AT1G04100 | IAA10 | B  |
| AT4G28640 | IAA11 | B  |
| AT1G04550 | IAA12 | B  |
| AT2G33310 | IAA13 | B  |
| AT4G14550 | IAA14 | A  |
| AT1G80390 | IAA15 | A  |
| AT3G04730 | IAA16 | A  |
| AT1G04250 | IAA17 | A  |
| AT1G51950 | IAA18 | B  |
| AT3G15540 | IAA19 | A  |
| AT2G46990 | IAA20 | C  |
| AT3G16500 | IAA26 | B  |
| AT4G29080 | IAA27 | A  |
| AT5G25890 | IAA28 | B  |
| AT4G32280 | IAA29 | C  |
| AT3G62100 | IAA30 | C  |
| AT3G17600 | IAA31 | C  |
| AT2G01200 | IAA32 | C  |
| AT5G57420 | IAA33 | C  |
| AT1G15050 | IAA34 | C  |
| AT1G15750 | TPL   | NA |
| AT1G80490 | TPR1  | NA |
| AT3G16830 | TPR2  | NA |
| AT5G27030 | TPR3  | NA |
| AT3G15880 | TPR4  | NA |
| AT1G59750 | ARF1  | B  |
| AT5G62000 | ARF2  | B  |
| AT2G33860 | ARF3  | B  |
| AT5G60450 | ARF4  | B  |
| AT1G19850 | ARF5  | A  |
| AT1G30330 | ARF6  | A  |

|           |       |   |
|-----------|-------|---|
| AT5G20730 | ARF7  | A |
| AT5G37020 | ARF8  | A |
| AT4G23980 | ARF9  | B |
| AT2G28350 | ARF10 | C |
| AT2G46530 | ARF11 | B |
| AT1G34310 | ARF12 | B |
| AT1G34170 | ARF13 | B |
| AT1G35540 | ARF14 | B |
| AT1G35520 | ARF15 | B |
| AT4G30080 | ARF16 | C |
| AT1G77850 | ARF17 | C |
| AT3G61830 | ARF18 | B |
| AT1G19220 | ARF19 | A |
| AT1G35240 | ARF20 | B |
| AT1G34410 | ARF21 | B |
| AT1G34390 | ARF22 | B |
| AT1G43950 | ARF23 | B |

## 1 **Ranking of variant functional effects**

- 2 Alignments were colored according to the strongest effect variant allele occurring at any
- 3 frequency at that position as reported in the SnpEFF “effect” field, per the scale in Figure 4.

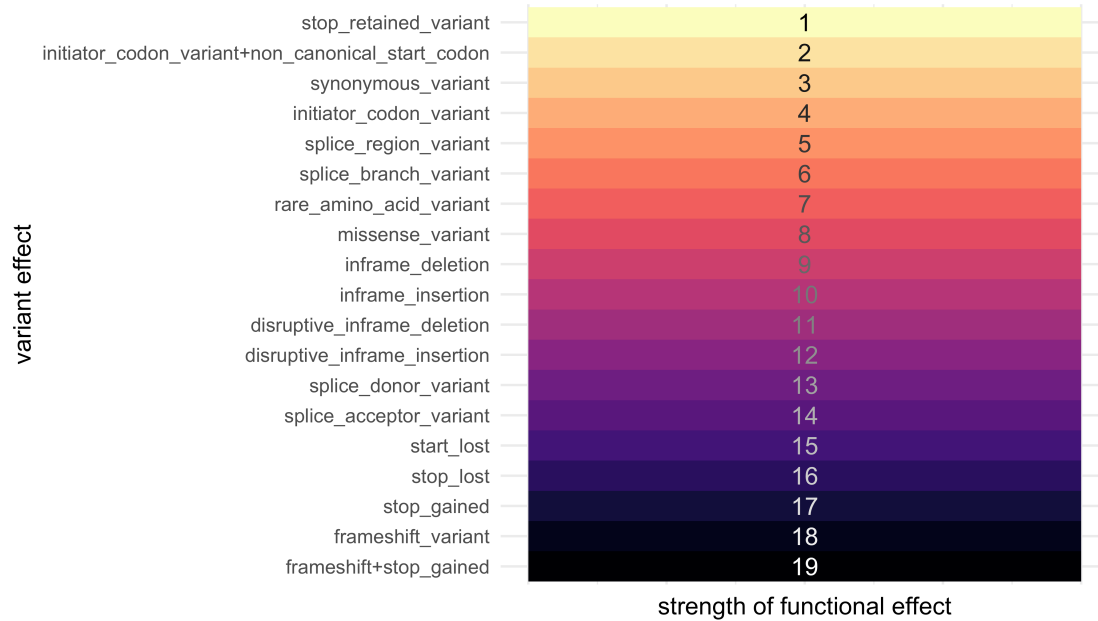

1

2 **Figure 4 Rank order of the strength of functional effects** Effect classes were ordered by  
 3 subjective prediction of average strength of effect on gene function. Strength was then  
 4 assigned to each effect on an integer scale.

## 5 Nucleotide Diversity Calculation

6 Nei and Li defined the nucleotide diversity statistic in their original paper as: “the average  
 7 number of nucleotide differences per site between two randomly chosen DNA sequences”  
 8 (Nei and Li 1979), and provided the equation:

9

$$\pi = \sum_{ij} x_i x_j \pi_{ij}. \quad (1)$$

10 Where  $x_i$  is the frequency of the  $i$ th sequence in the population and  $\pi_{ij}$  is the number of  
 11 sites that are different between the  $i$ th and  $j$ th sequence divided by sequence length.

12 A more general form, that treats each sequence in the population as unique can be written  
 13 as:

14

$$\pi = \frac{1}{L * n^2} \sum_{i=1}^n \sum_{j=1}^n \sum_{k=1}^L \pi_{ijk} \quad \pi_{ijk} = \begin{cases} 1 & \text{if } N_{ik} \neq N_{jk} \\ 0 & \text{if } N_{ik} = N_{jk} \end{cases} \quad (2)$$

15 where  $N_{ik}$  is the nucleotide (A, T, C or G) at position  $k$  on the  $i$ th sequence of the population.  
 16  $L$  is the length of the sequence. Indels are excluded from the diversity calculation leading to  
 17 a single  $L$  for the population.  $n$  is the total number of sequences in the population.

18 From this form we can re-arrange summations to the form below:

$$\pi = \frac{1}{L} \sum_{k=1}^L \pi_k \quad \pi_k = \frac{1}{n^2} \sum_{i=1}^n \sum_{j=1}^n \pi_{ijk} \quad (3)$$

where  $\pi_k$  can be thought of as the site-wise nucleotide diversity at position  $k$ , and is equal to the nucleotide diversity of a sequence of length 1 at location  $k$ . We can calculate  $\pi_k$  for each site, then average those over the sequence length to calculate  $\pi$ , the nucleotide diversity of the sequence.

The function `Nucleotide_diversity` in the `r1001genomes` package calculates  $\pi_k$  for each position in the gene or region that contains a variant. Note,  $\pi_k$  is equal to 0 at all locations without variants. This is also what is displayed in the Diversity Plot tab of the webtool.

### Detailed $\pi_k$ calculation simplification.

The formula for  $\pi_k$  above requires comparing every sequence to every other sequence at location  $k$ , however, we know there are only a few variant forms at each individual location.

So, we can revert back to using Nei and Li's original formula (1), modifying it slightly, replacing  $x_i$  with  $\frac{n_i}{n}$ ,  $n_i$  being the number of sequences in the population with nucleotide  $N_i$  at location  $k$ :

$$\pi_k = \sum_{ij} \frac{n_i n_j}{n n} \pi_{ij} = \frac{1}{n^2} \sum_{ij} n_i n_j \pi_{ij} \quad \pi_{ij(k)} = \begin{cases} 1 & \text{if } i \neq j \\ 0 & \text{if } i = j \end{cases} \quad (4)$$

Note that in equation (1) subscripts  $i$  and  $j$  are summed over all sequences in the population, however in equation (4)  $i$  and  $j$  are only summed over unique variants at a particular location  $k$ .

We will define  $n_{\neq i} = n - n_i$  as the number of sequences different from  $i$  at position  $k$ . We can also see that the summed term will be zero if  $i = j$ , and  $n_i n_j$  if  $i \neq j$ . Therefore:

$$\pi_k = \frac{1}{n^2} \sum_i n_i n_{\neq i} \quad (5)$$

Next we substitute our definition of  $n_{\neq i}$ :

$$\pi_k = \frac{1}{n^2} \sum_i n_i (n - n_i) \quad (6)$$

Distributing and splitting summation yields:

$$\pi_k = \frac{1}{n^2} (n \sum_i n_i - \sum_i n_i^2) \quad (7)$$

Finally, summing  $\sum_i n_i$  is equal to  $n$ :

1 
$$\pi_k = \frac{1}{n^2} (n^2 - \sum_i n_i^2) \quad (8)$$

2 This simplified form for  $\pi_k$  is used by the app, because the counts of unique variants at a  
3 single nucleotide location can easily be summarized in R.

#### 4 **Software**

5 The r1001genomes package has many software dependencies on other R packages, a few of  
6 the key bioinformatics packages used are listed below.

7 **biomaRt:** used for accessing the TAIR10 database on arabidopsis.org

8 **vcfR:** used to read in the VCF files in a flat “tidy” format for easy manipulation

9 **BSgenome:** used as the source for the complete DNA string of the reference genome (Col-  
10 0).

11 **DECIPHER:** used to align nucleotide and amino acid sequences of homologous genes

12 **GenomicFeatures:** used for handling sequence annotations.

13 **Biostrings:** provides the underlying framework for the sequence manipulations used for  
14 generating and aligning sequences with BSgenome, Decipher, and GenomicFeatures

15 Other packages that were critical to building ViVa and/or writing this document include:  
16 (Paradis et al. 2018; R Core Team 2018; Müller 2018; Team 2018; Pagès et al. 2018; Xie  
17 2018a; Ihaka et al. 2016; Wright 2018; Wickham, François, et al. 2018; Xie 2018b; Wickham  
18 2018a; Aphalo 2018a; Wickham, Chang, et al. 2018; Aphalo 2018b; Wagih 2017; Arnold  
19 2018; Yu and Lam 2018; Heibl 2014; Pagès, Aboyoun, and Lawrence 2018; Xie 2018c;  
20 Bache and Wickham 2014; Wickham 2016; Henry and Wickham 2018; Hamm and Wright  
21 2018; Neuwirth 2014; Wickham, Hester, and Francois 2017; Wickham 2017a; Allaire,  
22 Ushey, and Tang 2018; Allaire et al. 2018; Müller et al. 2018; Pagès, Lawrence, and  
23 Aboyoun 2018; Wickham 2018b; Wickham 2018c; Müller and Wickham 2018; Wickham  
24 and Henry 2018; Wickham 2017b; Yu 2018; Garnier 2018a; Garnier 2018b; Temple Lang  
25 and CRAN Team 2018; Pagès and Aboyoun 2018)



## 1 Acknowledgements

2 The authors would like to thank Oghenemega Okolo for assistance testing the ViVa  
3 software, and Song Li and Bo Zhang for helpful comments on the manuscript. This work  
4 was supported by the National Institute of Health (R01-GM107084), the National Science  
5 Foundation (IOS-1546873) and the Howard Hughes Medical Institute. R.C.W. received  
6 fellowship support from the National Science Foundation (DBI-1402222). B.L.M. and H.K.  
7 received support from the M.J. Murdock Charitable Trust. A.R.L. is a Simons Foundation  
8 Fellow of the Life Sciences Research Foundation. A.L. was supported by an NSF Graduate  
9 Research Fellowship DGE-1256082.

## 10 Supplemental Data

### 11 *TIR1/AFB* genes

12 Auxin acts by binding to receptors (Auxin-signaling F-Boxes, or AFBs) that in turn target  
13 co-repressors (Aux/IAAs) for degradation. The six auxin receptor genes in the model plant  
14 *Arabidopsis thaliana*, *TIR1* and *AFB1-5*, evolved through gene duplication and  
15 diversification early in the history of vascular plants (Parry et al. 2009). The rate of co-  
16 repressor degradation is determined by the identity of both the receptor and co-repressor  
17 (Havens et al. 2012), and this rate sets the pace of lateral root development (Guseman et al.  
18 2015).

19 All members of this family have been shown to bind auxin and Aux/IAA proteins. However,  
20 AFB1 has drastically reduced ability to assemble into an SCF complex, due to the  
21 substitution E8K in its F-box domain, preventing it from inducing degradation of Aux/IAAs  
22 (Yu et al. 2015). This lack of SCF formation may allow for the high and ubiquitous AFB1  
23 accumulation observed in *Arabidopsis* tissues (Parry et al. 2009). Higher order receptor  
24 mutants in the family containing *afb1* mutants suggest that *AFB1* has a moderate positive  
25 effect on auxin signaling (Dharmasiri et al. 2005). Additionally, AFB4 and AFB5 have been  
26 shown to preferentially and functionally bind the synthetic auxin picloram, while other  
27 family members preferentially bind indole-3-acetic acid (Prigge et al. 2016). Interestingly,  
28 the strength and rate with which *TIR1/AFBs* are able to bind and mark Aux/IAAs for  
29 degradation are variable (Calderón Villalobos et al. 2012; Havens et al. 2012). AFB2  
30 induces the degradation of certain Aux/IAA proteins at a faster rate than *TIR1*, suggesting  
31 some functional specificity has arisen since the initial duplication between the *TIR1/AFB1*  
32 and *AFB2/AFB3* clades.

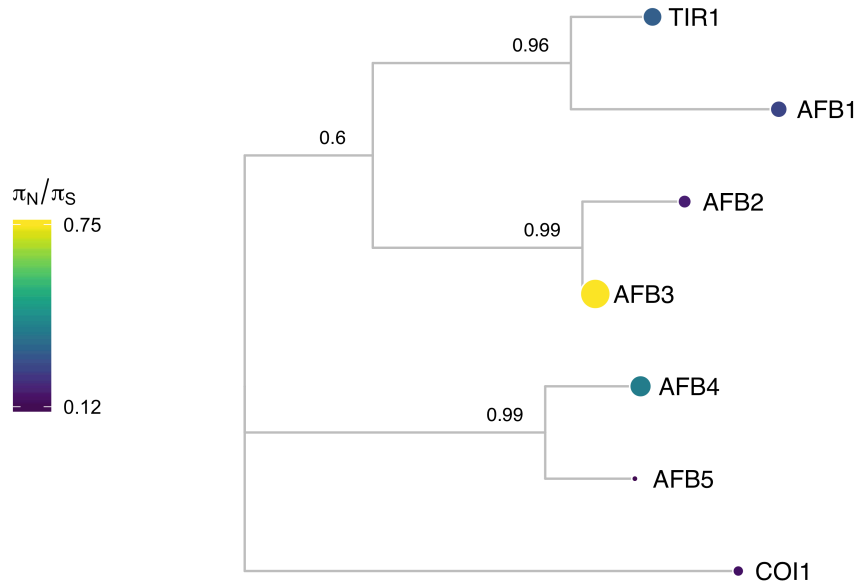

1

2 **Figure 5 AFB protein sequence tree mapped with  $\pi_N/\pi_S$ .** Protein sequences were aligned  
3 with DECIPHER (Wright 2015) and low information content regions were masked with  
4 Aliscore (Kück et al. 2010) prior to inferring a phylogeny with MrBayes (Ronquist and  
5 Huelsenbeck 2003). Tips of the tree are mapped with circles of diameter proportional to  
6  $\pi_N/\pi_S$  and also are colored according to  $\pi_N/\pi_S$ . Nodes are labeled with the posterior  
7 probability of monophyly.

8 Examining the natural sequence variation across the AFB family 5 revealed that TIR1 and  
9 AFB1 both had very low nonsynonymous diversity, hinting at their likely functional  
10 importance and bringing in to question the inconclusive role of AFB1 in auxin signaling.  
11 AFB3 and AFB4 had higher nonsynonymous diversity, while their sister genes, AFB2 and  
12 AFB5 were more conserved. This matches our current understanding of AFB3 as playing a  
13 minor role in the auxin signaling pathway (Dharmasiri et al. 2005) and suggests AFB4 may  
14 be undergoing pseudogenization, especially when paired with its low expression levels  
15 (Prigge et al. 2016).

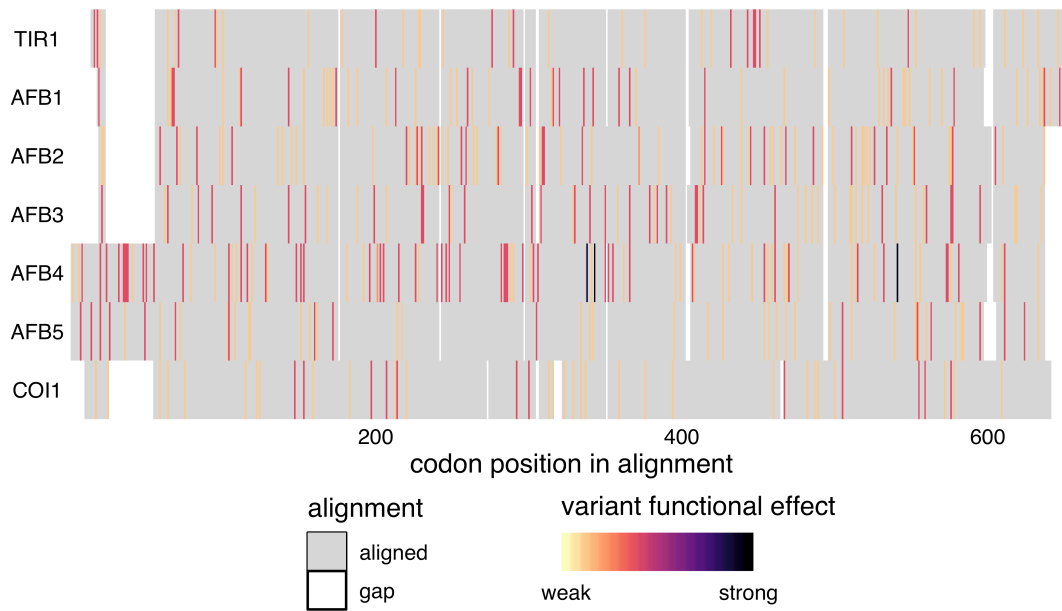

**Figure 6 Alignment of the AFB family** Protein sequences were aligned with DECIPHER (Wright 2015) and variants were mapped to this alignment and colored according to the predicted functional effect of the allele of strongest effect at that position, with light colors having weaker effects on function and darker colors stronger effects. Red indicates missense variants. Color scale is explained in [Methods](#).

Although most known functional regions are highly conserved in *AFB1*, there are some nonsynonymous polymorphism in the oligomerization domain that are only present in single accessions (F125E in Can-0 and I163N in Pu2-23). Mutations in this domain of *TIR1* frequently have a semidominant effect on root phenotypes (Dezfulian et al. 2016; Wright et al. 2017). Characterization of this allele and accession may help determine the role of *AFB1* in this pathway.

The *AFB4* and *AFB5* receptors have an N-terminal extension prior to their F-box domains. This extension had very high nonsynonymous diversity (Figure 6, suggesting that this extension does not play an important functional role in these proteins. Additionally, two frameshift variants and one stop-gained variant were observed in *AFB4* supporting its pseudogenization.

## **Aux/IAA genes**

For simplicity we have included only the alignment of the class A Aux/IAAs in the main manuscript. For completion we include here the complete alignment of the family.

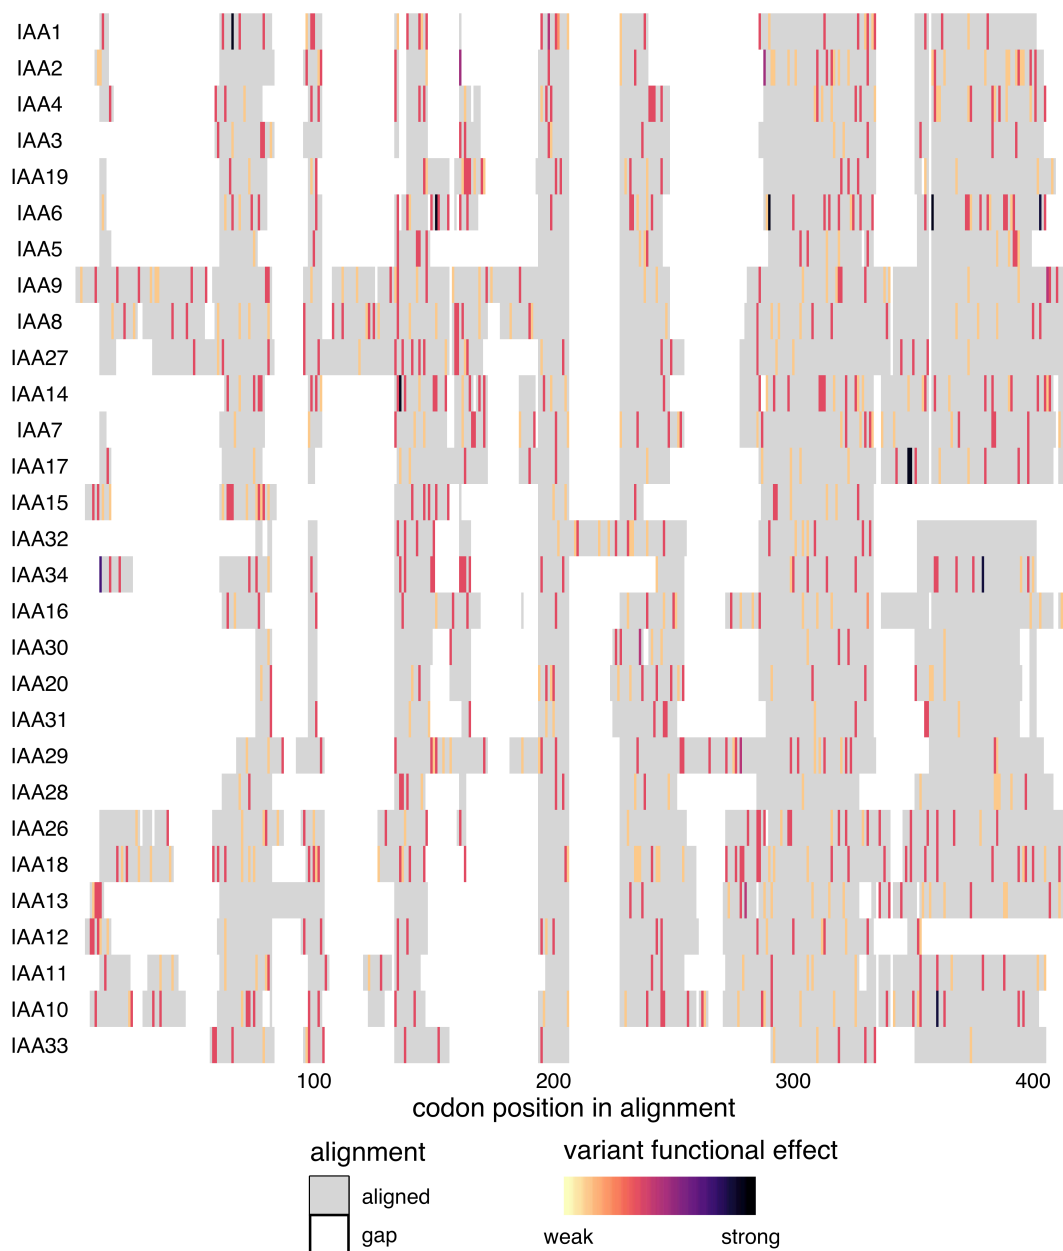

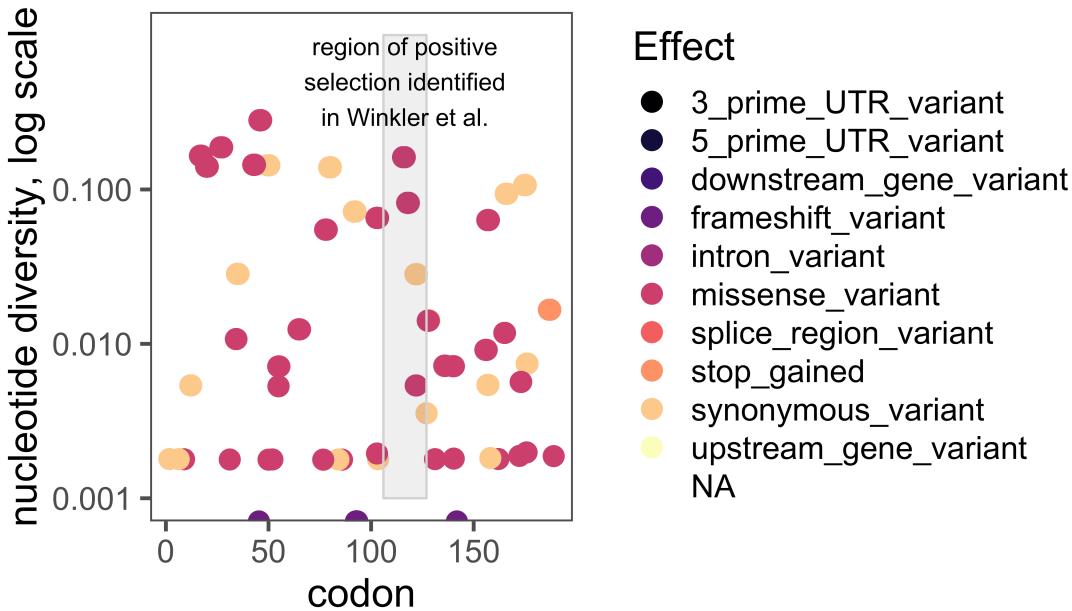

1  
2 **Figure 8 IAA6 diversity plot** Nucleotide diversity of variant positions throughout the IAA6  
3 coding sequence are plotted and colored according to the effect of the variant alleles at each  
4 position. The region of positive selection identified by Winkler et al. is highlighted.

## 5 **TPL/TPR genes**

6 The auxin signaling pathway utilizes the TOPLESS (TPL) and TOPLESS-related (TPR) family  
7 of Gro/TLE/TUP1 type co-repressor proteins to maintain auxin responsive genes in a  
8 transcriptionally-repressed state in the absence of auxin (Szemenyei, Hannon, and Long  
9 2008). In *Arabidopsis thaliana* the five member TPL/TPR family includes TPL and TPR1-4.  
10 The resulting proteins are comprised of three structural domains: an N-terminal TPL  
11 domain and two WD-40 domains (Long et al. 2006). TPL/TPR proteins are recruited to the  
12 AUX/IAA proteins through interaction with the conserved Ethylene-responsive element  
13 binding factor-associated amphiphilic repression (EAR) domain (Szemenyei, Hannon, and  
14 Long 2008). Canonical EAR domains have the amino acid sequence LxLxL, as found in most  
15 AUX/IAAs (Overvoorde et al. 2005). TPL/TPR co-repressors bind EAR domains via their C-  
16 terminal to LisH (CTLH) domains found near their N-termini (citations of pre-structure  
17 founding papers/reviews). Recent structural analyses of the TPL N-terminal domain have  
18 highlighted the precise interaction interface between TPL and AUX/IAA EAR domains, as  
19 well as the TPL-TPL dimerization and tetramerization motifs (Martin-Arevalillo et al. 2017;  
20 Ke et al. 2015). The residues required for higher-order multimers of TPL tetramers have  
21 also been identified (Ma et al. 2017). Additional interactions with transcriptional regulation  
22 and chromatin modifying machinery are likely mediated by two tandem beta propeller  
23 domains of TPL/TPRs.

24 The TOPLESS co-repressor family generally exhibits a high level of sequence conservation  
25 at the amino acid sequence level across resequenced *Arabidopsis thaliana* accessions, with  
26 all  $\pi_N/\pi_S$  values below 1 (Figure 9). The closely related TPL and TPR1 have the highest

1  $\pi_N/\pi_S$  values, suggesting that these two related genes tolerate a higher degree of  
2 sequence and potentially functional diversity compared to *TPR2/3/4*. The N-terminal TPL  
3 domain of the TPL/TPR family is particularly conserved. All nonsynonymous  
4 polymorphisms observed in this region are either in the coils between helices or are highly  
5 conservative mutations within helices (i.e. valine to isoleucine), which would be predicted  
6 to exhibit little effect on folding and function.

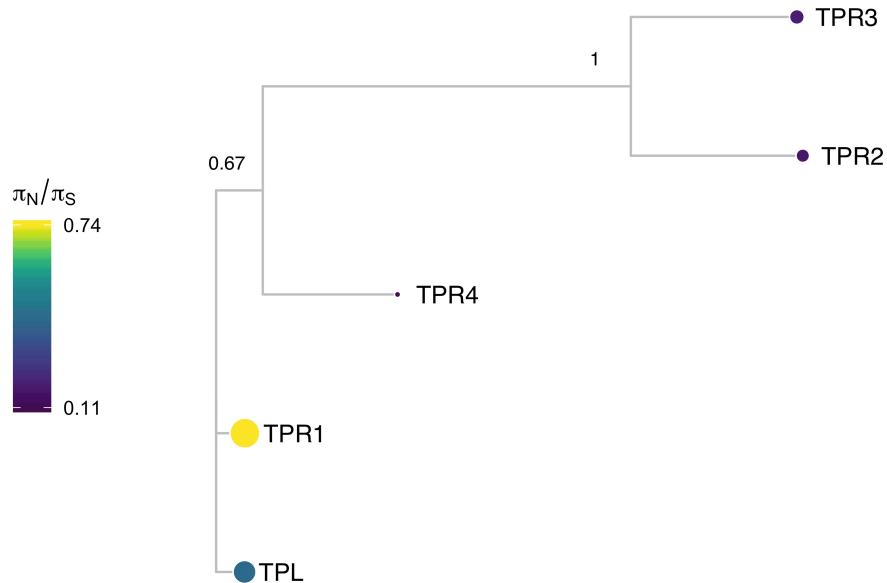

7

8 **Figure 9 TPL protein sequence tree mapped with  $\pi_N/\pi_S$ .** Protein sequences were aligned  
9 with DECIPHER (Wright 2015) and low information content regions were masked with  
10 Aliscore (Kück et al. 2010) prior to inferring a phylogeny with MrBayes (Ronquist and  
11 Huelsenbeck 2003). Tips of the tree are mapped with circles of diameter proportional to  
12  $\pi_N/\pi_S$  and also are colored according to  $\pi_N/\pi_S$ . Nodes are labeled with the poster probability  
13 of monophyly.

14 The high degree of conservation in the entire N-terminal domain underscores its  
15 importance in TPL/TPR function (Figure 10. For example, the initial *tpl-1* mutation  
16 (N176H) in the ninth helix is a dominant gain-of-function allele (Long et al. 2006), which is  
17 capable of binding wild-type TPL protein and inducing protein aggregation (Ma et al.  
18 2017). It is therefore understandable that this helix had very low diversity as  
19 nonsynonymous variants in this domain could act in a dominant negative fashion.

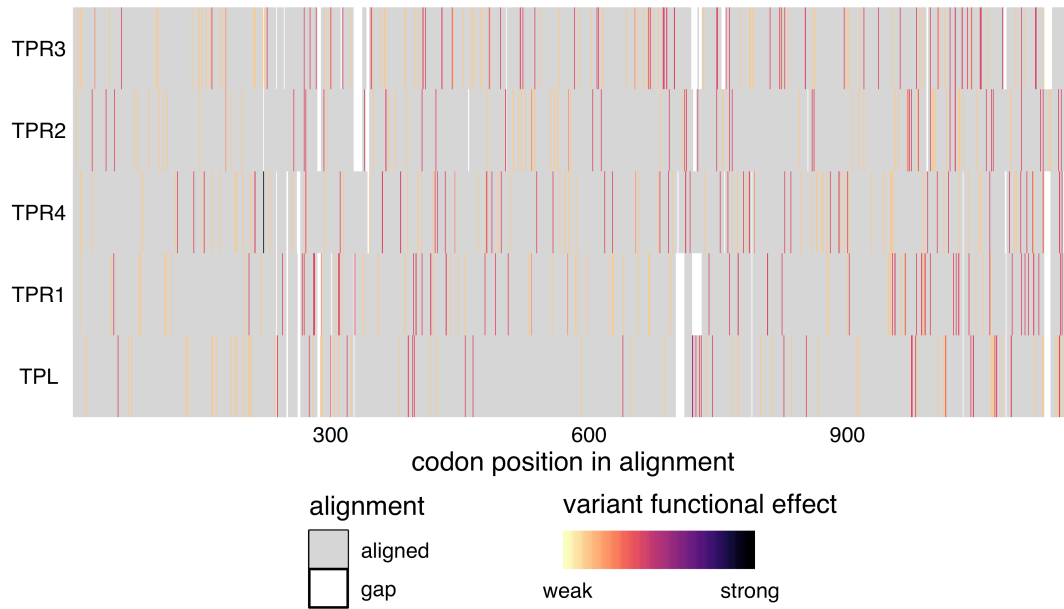

1  
2 **Figure 10 Alignment of the TPL/TPR family.** Protein sequences were aligned with  
3 DECIPHER (Wright 2015) and variants were mapped to this alignment and colored according  
4 to the predicted functional effect of the allele of strongest effect at that position, with light  
5 colors having weaker effects on function and darker colors stronger effects. Red indicates  
6 missense variants. Color scale is explained in Methods.

## 7 **ARF genes**

8 Auxin response is mediated by the auxin responsive transcription factors (ARFs). There are  
9 23 ARFs in *Arabidopsis thaliana* that are divided into three phylogenetic classes. Class A  
10 ARFs (ARF5, ARF6, ARF7, ARF8 and ARF19) activate transcription. These ARFs have a  
11 glutamine-rich region in the middle of the protein that may mediate activation (Guilfoyle  
12 and Hagen 2007). It has recently been shown that the middle region of ARF5 interacts with  
13 the SWI/SNF chromatin remodeling ATPases BRAMA and SPLAYED, possibly to reduce  
14 nucleosome occupancy and allow for the recruitment of transcription machinery (Wu et al.  
15 2015). Additionally, ARF7 interacts with Mediator subunits, directly tethering  
16 transcriptional activation machinery to its binding sites in the chromosome (Ito et al.  
17 2016). Class B and C ARFs are historically categorized as repressor ARFs, though the  
18 mechanism through which they confer repression has not been identified. Their middle  
19 regions tend to be proline- and serine-rich.

20 Canonical ARFs are comprised of three major domains. Recent crystallization of these  
21 domains have informed structure-function analysis of the ARFs (Boer et al. 2014; Korasick  
22 et al. 2014; Nanao et al. 2014). These domains are conserved throughout land plants (Mutte  
23 et al. 2018). ARFs share an N-terminal B3 DNA binding domain. Flanking this DNA-binding  
24 domain is a dimerization domain, which folds up into a single “taco-shaped” domain to  
25 allow for dimerization between ARFs. There is an auxiliary domain that immediately

1 follows and interacts with the dimerization domain. The middle region is the most variable  
2 between ARFs, as mentioned above, but is characterized by repetitive units of glutamine  
3 (class A), serine, or proline residues (classes B and C). The C-terminal domain of canonical  
4 ARFs is a PB1 protein-protein interaction domain mediating interactions among ARFs,  
5 between ARFs and other transcription factors, and between ARFs and the Aux/IAA  
6 repressors. This interaction domain was recently characterized as a Phox and Bem1 (PB1)  
7 domain, which is comprised of a positive and negative face with conserved basic and acidic  
8 residues, respectively (Korasick et al. 2014; Nanao et al. 2014). The dipolar nature of the  
9 PB1 domain may mediate multimerization by the pairwise interaction of these faces on  
10 different proteins as the ARF7 PB1 domain was crystallized as a multimer (Korasick et al.  
11 2014). However, it is unclear whether ARF multimerization occurs or plays a significant  
12 role *in vivo*. Interfering with ARF dimerization in either the DNA-binding proximal  
13 dimerization domain or the PB1 domain decreases the ability of class A ARFs to activate  
14 transcription in a heterologous yeast system (Pierre-Jerome et al. 2016).

15 While domain architecture is broadly conserved among the ARFs, there are exceptional  
16 cases. Three ARFs do not contain a PB1 domain at all, ARF3, ARF13, and ARF17, and several  
17 more have lost the conserved acidic or basic residues in the PB1 domain, suggesting they  
18 may be reduced to a single interaction domain. Several ARFs additionally have an expanded  
19 conserved region within the DNA-binding domain, of unknown function. The majority of  
20 domain variation among ARFs occurs in the large B-class subfamily. The liverwort  
21 *Marchantia polymorpha* has a single representative ARF of each class (Flores-Sandoval,  
22 Eklund, and Bowman 2015). The expansion of these classes in flowering plants is the result  
23 of both whole genome and tandem duplication events (Remington et al. 2004). The growth  
24 of the ARF family may have allowed for the expansion of the quantity and complexity of loci  
25 regulated by the ARFs and subsequent expansion in their regulation of developmental  
26 processes (Mutte et al. 2018).

27 Class A ARFs are the most well-studied ARF subfamily—the five family members all act as  
28 transcriptional activators and have well-characterized, distinct developmental targets.  
29 Overall the diversity of class A ARFs was generally low, especially compared to the class B  
30 and C ARFs (Figure 11), suggesting that class A ARFs are central to auxin signal  
31 transduction and plant development. Analysis of class A ARF nonsynonymous diversity  
32 suggests that the majority of these ARFs are highly functionally conserved, with  $\pi_N/\pi_S$   
33 values much lower than 1 with the exception of *ARF19*, with  $\pi_N/\pi_S$  value of 1.8. Comparing  
34 diversity within sister pairs, there is a similar trade-off as seen in most *IAA* sister pairs,  
35 with one sister being highly conserved and the other more divergent. *ARF19* and *ARF8* are  
36 the more divergent class A ARFs, with  $\pi_N/\pi_S$  values at least three times those of their sisters,  
37 *ARF7* and *ARF6* respectively. This may suggest that ARF6 and ARF7 serve more essential  
38 purposes in plant development.



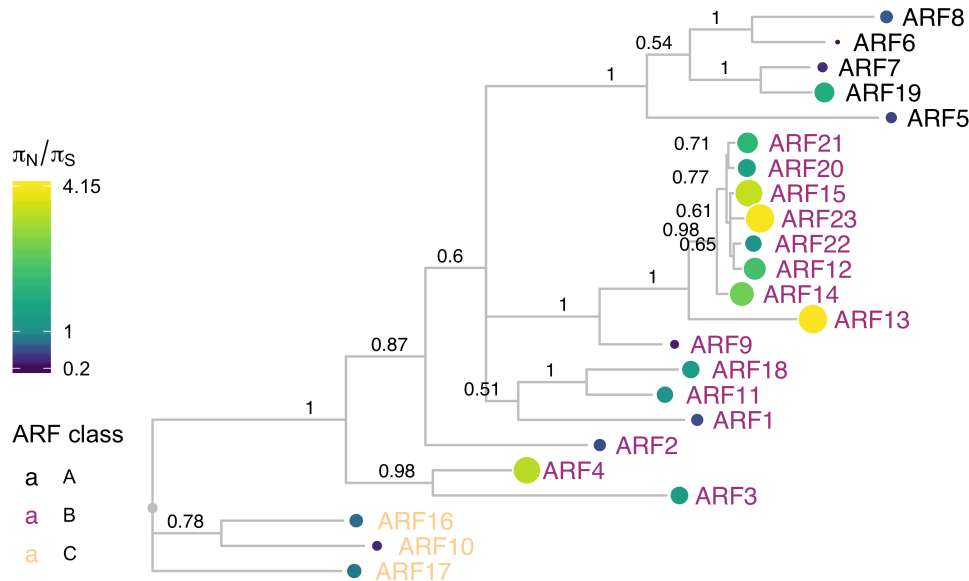

1  
2 **Figure 11 ARF protein sequence tree mapped with  $\pi_N/\pi_S$ .** Protein sequences were aligned  
3 with DECIPHER (Wright 2015) and low information content regions were masked with  
4 Aliscore (Kück et al. 2010) prior to inferring a phylogeny with MrBayes (Ronquist and  
5 Huelsenbeck 2003). Tips of the tree are mapped with circles of diameter proportional to  
6  $\pi_N/\pi_S$  and also are colored according to  $\pi_N/\pi_S$ . Nodes are labeled with the posterior probability  
7 of monophyly.

8 For all class A ARFs, the middle region of the protein was the predominant high diversity  
9 region (Figure 12). In the analyzed natural variation, ARF7 had several expansions of  
10 polyglutamine sequences in the middle region. Polyglutamine regions are known to readily  
11 expand and contract throughout evolutionary time due to replication error, and variation  
12 in polyglutamine length can be acted on by natural selection and have phenotypic  
13 consequences (Press, Carlson, and Queitsch 2014). The ARF DNA-binding domain had very  
14 few, low-diversity missense mutations, as did the critical residues of the PB1 domain.  
15 Considering the necessity of their conserved functions, the low level of variation in these  
16 key DNA and protein-protein interaction domains is expected.

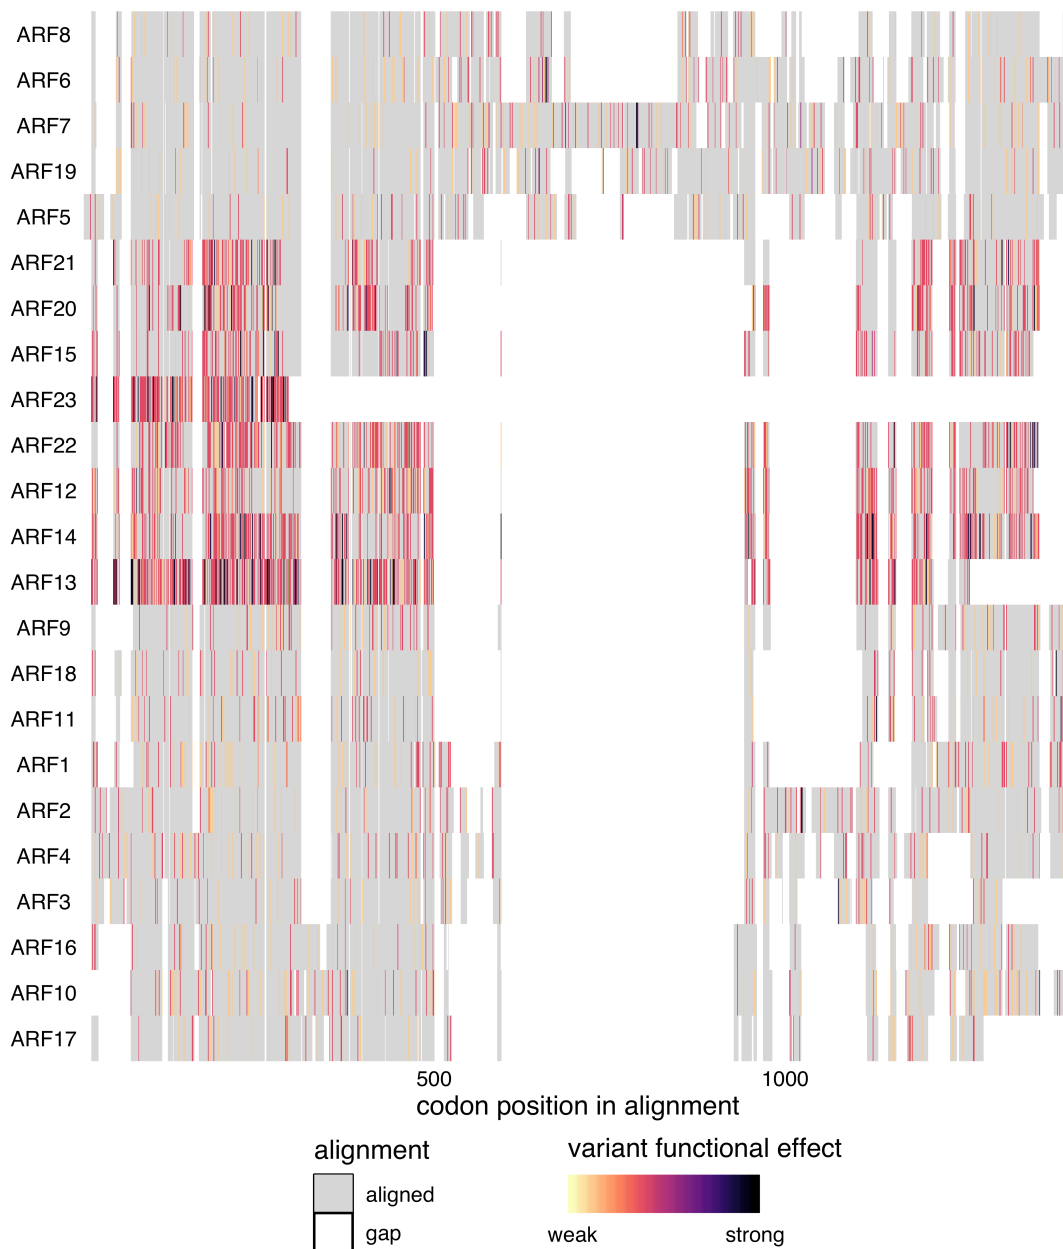

1  
2 **Figure 12 Alignment of the full ARF family.** Protein sequences were aligned with DECIPHER  
3 (Wright 2015) and variants were mapped to this alignment and colored according to the  
4 predicted functional effect of the allele of strongest effect at that position, with light colors  
5 having weaker effects on function and darker colors stronger effects. Red indicates missense  
6 variants. Color scale is explained in Methods.

7 Many of the class B ARFs have very high  $\pi_N/\pi_S$  ratios relative to the other ARFs. ARF23 has  
8 a truncated DNA-binding domain and had a high  $\pi_N/\pi_S$  value of 4.1. ARF13 has many high-  
9 diversity nonsense variants and lacks a C-terminal PB1 domain. This high level of diversity,  
10 prevalence of high-frequency nonsense variants and frequent loss of critical domains, may  
11 suggest that several genes in this class are undergoing pseudogenization.

1 There are also a few highly conserved class B *ARFs*. The high conservation of *ARF1* and  
2 *ARF2* is expected as they play critical, redundant roles in senescence and abscission (Ellis et  
3 al. 2005). Little is known about *ARF9* however, and its low nonsynonymous diversity  
4 maybe worthy of investigation.

5 Class C ARFs show low nucleotide diversity scores, with all  $\pi_N/\pi_S$  values substantially  
6 lower than 1. *ARF16* was the most conserved, whereas its clade members (*ARF10*, *ARF17*)  
7 had scores at least four times higher. Structurally, all three members of Class C ARFs  
8 contain a canonical B3 DNA-binding domain, but only ARF10 and ARF16 contain a PB1  
9 domain. The DNA binding domains exhibit overall low diversity. Of the PB1 domain  
10 containing class C ARFs, ARF16 exhibits several missense variants which are sporadically  
11 distributed, in contrast to the conserved PB1 domain of ARF10. This conservation in the  
12 PB1 domain of ARF10 and the DBD of ARF16 may suggest subfunctionalization in this  
13 family.

## 14 References

- 15 Alexandre, Cristina M., James R. Urton, Ken Jean-Baptiste, John Huddleston, Michael W.  
16 Dorrity, Josh T. Cuperus, Alessandra M. Sullivan, et al. 2018. "Complex Relationships  
17 Between Chromatin Accessibility, Sequence Divergence, and Gene Expression in  
18 *Arabidopsis Thaliana*." *Molecular Biology and Evolution* 35 (4): 837–54.  
19 doi:[10.1093/molbev/msx326](https://doi.org/10.1093/molbev/msx326).
- 20 Allaire, JJ, Kevin Ushey, and Yuan Tang. 2018. *Reticulate: Interface to 'Python'*.  
21 <https://CRAN.R-project.org/package=reticulate>.
- 22 Allaire, JJ, Yihui Xie, Jonathan McPherson, Javier Luraschi, Kevin Ushey, Aron Atkins, Hadley  
23 Wickham, Joe Cheng, and Winston Chang. 2018. *Rmarkdown: Dynamic Documents for R*.  
24 <https://CRAN.R-project.org/package=rmarkdown>.
- 25 Aphalo, Pedro J. 2018a. *Gginnards: Explore the Innards of 'Ggplot2' Objects*. [https://CRAN.R-](https://CRAN.R-project.org/package=gginnards)  
26 [project.org/package=gginnards](https://CRAN.R-project.org/package=gginnards).
- 27 ———. 2018b. *Ggpmisc: Miscellaneous Extensions to 'Ggplot2'*. [https://CRAN.R-](https://CRAN.R-project.org/package=ggpmisc)  
28 [project.org/package=ggpmisc](https://CRAN.R-project.org/package=ggpmisc).
- 29 Arnold, Jeffrey B. 2018. *Ggthemes: Extra Themes, Scales and Geoms for 'Ggplot2'*.  
30 <https://CRAN.R-project.org/package=ggthemes>.
- 31 Atwell, Susanna, Yu S. Huang, Bjarni J. Vilhjálmsson, Glenda Willems, Matthew Horton, Yan  
32 Li, Dazhe Meng, et al. 2010. "Genome-Wide Association Study of 107 Phenotypes in  
33 *Arabidopsis Thaliana* Inbred Lines." *Nature* 465 (7298): 627–31.  
34 doi:[10.1038/nature08800](https://doi.org/10.1038/nature08800).
- 35 Bache, Stefan Milton, and Hadley Wickham. 2014. *Magrittr: A Forward-Pipe Operator for R*.  
36 <https://CRAN.R-project.org/package=magrittr>.

- 1 Boer, D. Roeland, Alejandra Freire-Rios, Willy A. M. van den Berg, Terrens Saaki, Iain W.  
2 Manfield, Stefan Kepinski, Irene López-Vidrieo, et al. 2014. "Structural Basis for DNA  
3 Binding Specificity by the Auxin-Dependent ARF Transcription Factors." *Cell* 156 (3): 577–  
4 89. doi:[10.1016/j.cell.2013.12.027](https://doi.org/10.1016/j.cell.2013.12.027).
- 5 Borevitz, Justin O., Samuel P. Hazen, Todd P. Michael, Geoffrey P. Morris, Ivan R. Baxter,  
6 Tina T. Hu, Huaming Chen, et al. 2007. "Genome-Wide Patterns of Single-Feature  
7 Polymorphism in Arabidopsis Thaliana." *Proceedings of the National Academy of Sciences of  
8 the United States of America* 104 (29): 12057–62. doi:[10.1073/pnas.0705323104](https://doi.org/10.1073/pnas.0705323104).
- 9 Calderón Villalobos, Luz Irina A., Sarah Lee, Cesar De Oliveira, Anthony Ivetaç, Wolfgang  
10 Brandt, Lynne Armitage, Laura B. Sheard, et al. 2012. "A Combinatorial Tir1/AFB-Aux/IAA  
11 Co-Receptor System for Differential Sensing of Auxin." *Nat Chem Biol* 8 (5): 477–85.  
12 doi:[10.1038/nchembio.926](https://doi.org/10.1038/nchembio.926).
- 13 Cheng, Chia-Yi, Vivek Krishnakumar, Agnes P. Chan, Françoise Thibaud-Nissen, Seth  
14 Schobel, and Christopher D. Town. 2017. "Araport11: A Complete Reannotation of the  
15 Arabidopsis Thaliana Reference Genome." *The Plant Journal* 89 (4): 789–804.  
16 doi:[10.1111/tpj.13415](https://doi.org/10.1111/tpj.13415).
- 17 Clark, Richard M., Gabriele Schweikert, Christopher Toomajian, Stephan Ossowski, Georg  
18 Zeller, Paul Shinn, Norman Warthmann, et al. 2007. "Common Sequence Polymorphisms  
19 Shaping Genetic Diversity in Arabidopsis Thaliana." *Science* 317 (5836): 338–42.  
20 doi:[10.1126/science.1138632](https://doi.org/10.1126/science.1138632).
- 21 Delker, Carolin, Yvonne Pöschl, Anja Raschke, Kristian Ullrich, Stefan Ettingshausen,  
22 Valeska Hauptmann, Ivo Grosse, and Marcel Quint. 2010. "Natural Variation of  
23 Transcriptional Auxin Response Networks in Arabidopsis Thaliana." *The Plant Cell* 22 (7):  
24 2184–2200. doi:[10.1105/tpc.110.073957](https://doi.org/10.1105/tpc.110.073957).
- 25 Dezfulian, Mohammad H., Espanta Jalili, Don Karl A. Roberto, Britney L. Moss, Kerry Khoo,  
26 Jennifer L. Nemhauser, and William L. Crosby. 2016. "Oligomerization of SCF Tir1 Is  
27 Essential for Aux/IAA Degradation and Auxin Signaling in Arabidopsis." *PLOS Genet* 12 (9):  
28 e1006301. doi:[10.1371/journal.pgen.1006301](https://doi.org/10.1371/journal.pgen.1006301).
- 29 Dharmasiri, Nihal, Sunethra Dharmasiri, Dolf Weijers, Esther Lechner, Masashi Yamada,  
30 Lawrence Hobbie, Jasmin S. Ehrismann, Gerd Jürgens, and Mark Estelle. 2005. "Plant  
31 Development Is Regulated by a Family of Auxin Receptor F Box Proteins." *Developmental  
32 Cell* 9 (1): 109–19. doi:[10.1016/j.devcel.2005.05.014](https://doi.org/10.1016/j.devcel.2005.05.014).
- 33 Ellis, Christine M., Punita Nagpal, Jeffery C. Young, Gretchen Hagen, Thomas J. Guilfoyle, and  
34 Jason W. Reed. 2005. "AUXIN RESPONSE Factor1 and AUXIN RESPONSE Factor2 Regulate  
35 Senescence and Floral Organ Abscission in Arabidopsis Thaliana." *Development* 132 (20):  
36 4563–74. doi:[10.1242/dev.02012](https://doi.org/10.1242/dev.02012).
- 37 Firnberg, Elad, and Marc Ostermeier. 2013. "The Genetic Code Constrains yet Facilitates  
38 Darwinian Evolution." *Nucleic Acids Research* 41 (15): 7420–8. doi:[10.1093/nar/gkt536](https://doi.org/10.1093/nar/gkt536).

- 1 Flores-Sandoval, Eduardo, D. Magnus Eklund, and John L. Bowman. 2015. "A Simple Auxin  
2 Transcriptional Response System Regulates Multiple Morphogenetic Processes in the  
3 Liverwort *Marchantia Polymorpha*." *PLOS Genetics* 11 (5): e1005207.  
4 doi:[10.1371/journal.pgen.1005207](https://doi.org/10.1371/journal.pgen.1005207).
- 5 Garnier, Simon. 2018a. *Viridis: Default Color Maps from 'Matplotlib'*. [https://CRAN.R-  
6 project.org/package=viridis](https://CRAN.R-project.org/package=viridis).
- 7 ———. 2018b. *ViridisLite: Default Color Maps from 'Matplotlib' (Lite Version)*.  
8 <https://CRAN.R-project.org/package=viridisLite>.
- 9 Gasperini, Molly, Lea Starita, and Jay Shendure. 2016. "The Power of Multiplexed Functional  
10 Analysis of Genetic Variants." *Nature Protocols* 11 (10): 1782–7.  
11 doi:[10.1038/nprot.2016.135](https://doi.org/10.1038/nprot.2016.135).
- 12 Guilfoyle, Tom J., and Gretchen Hagen. 2007. "Auxin Response Factors." *Current Opinion in  
13 Plant Biology*, Cell signalling and gene regulation edited by jian-kang zhu and ko shimamoto,  
14 10 (5): 453–60. doi:[10.1016/j.pbi.2007.08.014](https://doi.org/10.1016/j.pbi.2007.08.014).
- 15 ———. 2012. "Getting a Grasp on Domain III/IV Responsible for Auxin Response Factor IAA  
16 Protein Interactions." *Plant Science* 190 (July): 82–88. doi:[10.1016/j.plantsci.2012.04.003](https://doi.org/10.1016/j.plantsci.2012.04.003).
- 17 Guseman, Jessica M., Antje Hellmuth, Amy Lanctot, Tamar P. Feldman, Britney L. Moss, Eric  
18 Klavins, Luz Irina A. Calderón Villalobos, and Jennifer L. Nemhauser. 2015. "Auxin-Induced  
19 Degradation Dynamics Set the Pace for Lateral Root Development." *Development* 142 (5):  
20 905–9. doi:[10.1242/dev.117234](https://doi.org/10.1242/dev.117234).
- 21 Hamm, Morgan O., and R. Clay Wright. 2018. *R1001genomes: Access and Analyze the 1001  
22 Genomes Arabidopsis Resequencing Dataset*.
- 23 Havens, Kyle A., Jessica M. Guseman, Seunghee S. Jang, Edith Pierre-Jerome, Nick Bolten,  
24 Eric Klavins, and Jennifer L. Nemhauser. 2012. "A Synthetic Approach Reveals Extensive  
25 Tunability of Auxin Signaling." *Plant Physiology* 160 (1): 135–42.  
26 doi:[10.1104/pp.112.202184](https://doi.org/10.1104/pp.112.202184).
- 27 Heibl, Christoph. 2014. *Ips: Interfaces to Phylogenetic Software in R*. [https://CRAN.R-  
28 project.org/package=ips](https://CRAN.R-project.org/package=ips).
- 29 Henry, Lionel, and Hadley Wickham. 2018. *Purrr: Functional Programming Tools*.  
30 <https://CRAN.R-project.org/package=purrr>.
- 31 Hughes, Austin L. 1999. *Adaptive Evolution of Genes and Genomes*. Oxford University Press.
- 32 Hughes, Austin L., Jonathan A. Green, Juana M. Garbayo, and R. Michael Roberts. 2000.  
33 "Adaptive Diversification Within a Large Family of Recently Duplicated, Placentally  
34 Expressed Genes." *Proceedings of the National Academy of Sciences of the United States of  
35 America* 97 (7): 3319–23.

- 1 Ihaka, Ross, Paul Murrell, Kurt Hornik, Jason C. Fisher, Reto Stauffer, and Achim Zeileis.  
2 2016. *Colorspace: Color Space Manipulation*. [https://CRAN.R-](https://CRAN.R-project.org/package=colorspace)  
3 [project.org/package=colorspace](https://CRAN.R-project.org/package=colorspace).
- 4 Ito, Jun, Hidehiro Fukaki, Makoto Onoda, Lin Li, Chuanyou Li, Masao Tasaka, and Masahiko  
5 Furutani. 2016. "Auxin-Dependent Compositional Change in Mediator in Arf7- and Arf19-  
6 Mediated Transcription." *Proceedings of the National Academy of Sciences*, May, 201600739.  
7 doi:[10.1073/pnas.1600739113](https://doi.org/10.1073/pnas.1600739113).
- 8 Jacob, François. 1977. "Evolution and Tinkering." *Science* 196 (4295): 1161–6.
- 9 Joly-Lopez, Zoé, Jonathan M Flowers, and Michael D Purugganan. 2016. "Developing Maps  
10 of Fitness Consequences for Plant Genomes." *Current Opinion in Plant Biology*, SI: 30:  
11 Genome studies and molecular genetics, 30 (April): 101–7. doi:[10.1016/j.cpb.2016.02.008](https://doi.org/10.1016/j.cpb.2016.02.008).
- 12 Joshi, Hiren J., Katy M. Christiansen, Joffrey Fitz, Jun Cao, Anna Lipzen, Joel Martin, A.  
13 Michelle Smith-Moritz, et al. 2012. "1001 Proteomes: A Functional Proteomics Portal for  
14 the Analysis of Arabidopsis Thaliana Accessions." *Bioinformatics* 28 (10): 1303–6.  
15 doi:[10.1093/bioinformatics/bts133](https://doi.org/10.1093/bioinformatics/bts133).
- 16 Ke, Jiyuan, Honglei Ma, Xin Gu, Adam Thelen, Joseph S. Brunzelle, Jiayang Li, H. Eric Xu, and  
17 Karsten Melcher. 2015. "Structural Basis for Recognition of Diverse Transcriptional  
18 Repressors by the TOPLESS Family of Corepressors." *Science Advances* 1 (6): e1500107.  
19 doi:[10.1126/sciadv.1500107](https://doi.org/10.1126/sciadv.1500107).
- 20 Kliebenstein, Daniel J. 2008. "A Role for Gene Duplication and Natural Variation of Gene  
21 Expression in the Evolution of Metabolism." *PLOS ONE* 3 (3): e1838.  
22 doi:[10.1371/journal.pone.0001838](https://doi.org/10.1371/journal.pone.0001838).
- 23 Korasick, David A., Corey S. Westfall, Soon Goo Lee, Max H. Nanao, Renaud Dumas, Gretchen  
24 Hagen, Thomas J. Guilfoyle, Joseph M. Jez, and Lucia C. Strader. 2014. "Molecular Basis for  
25 AUXIN RESPONSE FACTOR Protein Interaction and the Control of Auxin Response  
26 Repression." *Proceedings of the National Academy of Sciences* 111 (14): 5427–32.  
27 doi:[10.1073/pnas.1400074111](https://doi.org/10.1073/pnas.1400074111).
- 28 Kück, Patrick, Karen Meusemann, Johannes Dambach, Birthe Thormann, Björn M. von  
29 Reumont, Johann W. Wägele, and Bernhard Misof. 2010. "Parametric and Non-Parametric  
30 Masking of Randomness in Sequence Alignments Can Be Improved and Leads to Better  
31 Resolved Trees." *Frontiers in Zoology* 7 (March): 10. doi:[10.1186/1742-9994-7-10](https://doi.org/10.1186/1742-9994-7-10).
- 32 Long, Jeff A., Carolyn Ohno, Zachery R. Smith, and Elliot M. Meyerowitz. 2006. "TOPLESS  
33 Regulates Apical Embryonic Fate in Arabidopsis." *Science* 312 (5779): 1520–3.  
34 doi:[10.1126/science.1123841](https://doi.org/10.1126/science.1123841).
- 35 Long, Quan, Fernando A Rabanal, Dazhe Meng, Christian D Huber, Ashley Farlow, Alexander  
36 Platzer, Qingrun Zhang, et al. 2013. "Massive Genomic Variation and Strong Selection in  
37 Arabidopsis Thaliana Lines from Sweden." *Nature Genetics* 45 (8): 884–90.  
38 doi:[10.1038/ng.2678](https://doi.org/10.1038/ng.2678).

- 1 Ma, Honglei, Jingbo Duan, Jiyuan Ke, Yuanzheng He, Xin Gu, Ting-Hai Xu, Hong Yu, et al.  
2 2017. "A D53 Repression Motif Induces Oligomerization of TOPLESS Corepressors and  
3 Promotes Assembly of a Corepressor-Nucleosome Complex." *Science Advances* 3 (6).  
4 doi:[10.1126/sciadv.1601217](https://doi.org/10.1126/sciadv.1601217).
- 5 Martin-Arevalillo, Raquel, Max H. Nanao, Antoine Larrieu, Thomas Vinos-Poyo, David Mast,  
6 Carlos Galvan-Ampudia, Géraldine Brunoud, Teva Vernoux, Renaud Dumas, and François  
7 Parcy. 2017. "Structure of the Arabidopsis TOPLESS Corepressor Provides Insight into the  
8 Evolution of Transcriptional Repression." *Proceedings of the National Academy of Sciences*,  
9 July, 201703054. doi:[10.1073/pnas.1703054114](https://doi.org/10.1073/pnas.1703054114).
- 10 Matreyek, Kenneth A., Jason J. Stephany, and Douglas M. Fowler. 2017. "A Platform for  
11 Functional Assessment of Large Variant Libraries in Mammalian Cells." *Nucleic Acids  
12 Research* 45 (11): e102. doi:[10.1093/nar/gkx183](https://doi.org/10.1093/nar/gkx183).
- 13 Melamed, Daniel, David L. Young, Christina R. Miller, and Stanley Fields. 2015. "Combining  
14 Natural Sequence Variation with High Throughput Mutational Data to Reveal Protein  
15 Interaction Sites." *PLoS Genet* 11 (2): e1004918. doi:[10.1371/journal.pgen.1004918](https://doi.org/10.1371/journal.pgen.1004918).
- 16 Michael, Todd P., Florian Jupe, Felix Bemm, S. Timothy Motley, Justin P. Sandoval, Christa  
17 Lanz, Olivier Loudet, Detlef Weigel, and Joseph R. Ecker. 2018. "High Contiguity Arabidopsis  
18 Thaliana Genome Assembly with a Single Nanopore Flow Cell." *Nature Communications* 9  
19 (1): 541. doi:[10.1038/s41467-018-03016-2](https://doi.org/10.1038/s41467-018-03016-2).
- 20 Mutte, Sumanth K., Hirotaka Kato, Carl Rothfels, Michael Melkonian, Gane Ka-Shu Wong,  
21 and Dolf Weijers. 2018. "Origin and Evolution of the Nuclear Auxin Response System." *eLife*  
22 7 (March): e33399. doi:[10.7554/eLife.33399](https://doi.org/10.7554/eLife.33399).
- 23 Müller, Kirill. 2018. *bindrcpp: An 'Rcpp' Interface to Active Bindings*. [https://CRAN.R-  
24 project.org/package=bindrcpp](https://CRAN.R-project.org/package=bindrcpp).
- 25 Müller, Kirill, and Hadley Wickham. 2018. *Tibble: Simple Data Frames*. [https://CRAN.R-  
26 project.org/package=tibble](https://CRAN.R-project.org/package=tibble).
- 27 Müller, Kirill, Hadley Wickham, David A. James, and Seth Falcon. 2018. *RSQLite: 'SQLite'  
28 Interface for R*. <https://CRAN.R-project.org/package=RSQLite>.
- 29 Nanao, Max H., Thomas Vinos-Poyo, Géraldine Brunoud, Emmanuel Thévenon, Meryl  
30 Mazzoleni, David Mast, Stéphanie Lainé, et al. 2014. "Structural Basis for Oligomerization of  
31 Auxin Transcriptional Regulators." *Nature Communications* 5: 3617.  
32 doi:[10.1038/ncomms4617](https://doi.org/10.1038/ncomms4617).
- 33 Nei, M, and W H Li. 1979. "Mathematical Model for Studying Genetic Variation in Terms of  
34 Restriction Endonucleases." *Proceedings of the National Academy of Sciences of the United  
35 States of America* 76 (10): 5269–73.
- 36 Nelson, Chase W., Louise H. Moncla, and Austin L. Hughes. 2015. "SNPGenie: Estimating  
37 Evolutionary Parameters to Detect Natural Selection Using Pooled Next-Generation  
38 Sequencing Data." *Bioinformatics* 31 (22): 3709–11. doi:[10.1093/bioinformatics/btv449](https://doi.org/10.1093/bioinformatics/btv449).

- 1 Neuwirth, Erich. 2014. *RColorBrewer: ColorBrewer Palettes*. [https://CRAN.R-](https://CRAN.R-project.org/package=RColorBrewer)  
2 [project.org/package=RColorBrewer](https://CRAN.R-project.org/package=RColorBrewer).
- 3 Nordborg, Magnus, Tina T Hu, Yoko Ishino, Jinal Jhaveri, Christopher Toomajian, Honggang  
4 Zheng, Erica Bakker, et al. 2005. "The Pattern of Polymorphism in Arabidopsis Thaliana."  
5 *PLoS Biol* 3 (7): e196. doi:[10.1371/journal.pbio.0030196](https://doi.org/10.1371/journal.pbio.0030196).
- 6 Overvoorde, Paul J., Yoko Okushima, José M. Alonso, April Chan, Charlie Chang, Joseph R.  
7 Ecker, Beth Hughes, et al. 2005. "Functional Genomic Analysis of the AUXIN/INDOLE-3-  
8 ACETIC ACID Gene Family Members in Arabidopsis Thaliana." *The Plant Cell* 17 (12): 3282-  
9 3300. doi:[10.1105/tpc.105.036723](https://doi.org/10.1105/tpc.105.036723).
- 10 Pagès, H., P. Aboyoun, and M. Lawrence. 2018. *IRanges: Infrastructure for Manipulating*  
11 *Intervals on Sequences*.
- 12 Pagès, H., P. Aboyoun, R. Gentleman, and S. DebRoy. 2018. *Biostrings: Efficient Manipulation*  
13 *of Biological Strings*.
- 14 Pagès, H., M. Lawrence, and P. Aboyoun. 2018. *S4Vectors: S4 Implementation of Vector-Like*  
15 *and List-Like Objects*.
- 16 Pagès, Hervé, and Patrick Aboyoun. 2018. *XVector: Representation and Manipulation of*  
17 *External Sequences*.
- 18 Paradis, Emmanuel, Simon Blomberg, Ben Bolker, Joseph Brown, Julien Claude, Hoa Sien  
19 Cuong, Richard Desper, et al. 2018. *Ape: Analyses of Phylogenetics and Evolution*.  
20 <https://CRAN.R-project.org/package=ape>.
- 21 Park, Briton, Matthew T. Rutter, Charles B. Fenster, V. Vaughan Symonds, Mark C. Ungerer,  
22 and Jeffrey P. Townsend. 2017. "Distributions of Mutational Effects and the Estimation of  
23 Directional Selection in Divergent Lineages of Arabidopsis Thaliana." *Genetics* 206 (4):  
24 2105-17. doi:[10.1534/genetics.116.199190](https://doi.org/10.1534/genetics.116.199190).
- 25 Parry, G., L. I. Calderon-Villalobos, M. Prigge, B. Peret, S. Dharmasiri, H. Itoh, E. Lechner, W.  
26 M. Gray, M. Bennett, and M. Estelle. 2009. "Complex Regulation of the Tir1/AFB Family of  
27 Auxin Receptors." *Proceedings of the National Academy of Sciences* 106 (52): 22540-5.  
28 doi:[10.1073/pnas.0911967106](https://doi.org/10.1073/pnas.0911967106).
- 29 Pierre-Jerome, Edith, Britney L. Moss, Amy Lanctot, Amber Hageman, and Jennifer L.  
30 Nemhauser. 2016. "Functional Analysis of Molecular Interactions in Synthetic Auxin  
31 Response Circuits." *Proceedings of the National Academy of Sciences of the United States of*  
32 *America* 113 (40): 11354-9. doi:[10.1073/pnas.1604379113](https://doi.org/10.1073/pnas.1604379113).
- 33 Press, Maximilian O., Keisha D. Carlson, and Christine Queitsch. 2014. "The Overdue  
34 Promise of Short Tandem Repeat Variation for Heritability." *Trends in Genetics: TIG* 30 (11):  
35 504-12. doi:[10.1016/j.tig.2014.07.008](https://doi.org/10.1016/j.tig.2014.07.008).
- 36 Prigge, Michael J., Kathleen Greenham, Yi Zhang, Aaron Santner, Cristina Castillejo, Andrew  
37 M. Mutka, Ronan C. O'Malley, Joseph R. Ecker, Barbara N. Kunkel, and Mark Estelle. 2016.



- 1 “The Arabidopsis Auxin Receptor F-Box Proteins Afb4 and Afb5 Are Required for Response  
2 to the Synthetic Auxin Picloram.” *G3: Genes/Genomes/Genetics* 6 (5): 1383–90.  
3 doi:[10.1534/g3.115.025585](https://doi.org/10.1534/g3.115.025585).
- 4 R Core Team. 2018. *R: A Language and Environment for Statistical Computing*. Vienna,  
5 Austria: R Foundation for Statistical Computing. <https://www.R-project.org/>.
- 6 Remington, David L., Todd J. Vision, Thomas J. Guilfoyle, and Jason W. Reed. 2004.  
7 “Contrasting Modes of Diversification in the Aux/IAA and ARF Gene Families.” *Plant*  
8 *Physiology* 135 (3): 1738–52. doi:[10.1104/pp.104.039669](https://doi.org/10.1104/pp.104.039669).
- 9 Ronquist, F., and J. P. Huelsenbeck. 2003. “MrBayes 3: Bayesian Phylogenetic Inference  
10 Under Mixed Models.” *Bioinformatics* 19 (12): 1572–4. doi:[10.1093/bioinformatics/btg180](https://doi.org/10.1093/bioinformatics/btg180).
- 11 Starita, Lea M., Nadav Ahituv, Maitreya J. Dunham, Jacob O. Kitzman, Frederick P. Roth,  
12 Georg Seelig, Jay Shendure, and Douglas M. Fowler. 2017. “Variant Interpretation:  
13 Functional Assays to the Rescue.” *The American Journal of Human Genetics* 101 (3): 315–25.  
14 doi:[10.1016/j.ajhg.2017.07.014](https://doi.org/10.1016/j.ajhg.2017.07.014).
- 15 Szemenyei, Heidi, Mike Hannon, and Jeff A. Long. 2008. “TOPLESS Mediates Auxin-  
16 Dependent Transcriptional Repression During Arabidopsis Embryogenesis.” *Science* 319  
17 (5868): 1384–6. doi:[10.1126/science.1151461](https://doi.org/10.1126/science.1151461).
- 18 Tan, Xu, Luz Irina A. Calderon-Villalobos, Michal Sharon, Changxue Zheng, Carol V.  
19 Robinson, Mark Estelle, and Ning Zheng. 2007. “Mechanism of Auxin Perception by the Tir1  
20 Ubiquitin Ligase.” *Nature* 446 (7136): 640–5. doi:[10.1038/nature05731](https://doi.org/10.1038/nature05731).
- 21 Team, The Bioconductor Dev. 2018. *BiocGenerics: S4 Generic Functions for Bioconductor*.
- 22 Temple Lang, Duncan, and the CRAN Team. 2018. *XML: Tools for Parsing and Generating*  
23 *Xml Within R and S-Plus*. <https://CRAN.R-project.org/package=XML>.
- 24 The Arabidopsis Genome Initiative. 2000. “Analysis of the Genome Sequence of the  
25 Flowering Plant *Arabidopsis Thaliana*.” *Nature* 408 (6814): 796–815.  
26 doi:[10.1038/35048692](https://doi.org/10.1038/35048692).
- 27 Tiwari, Shiv B., Gretchen Hagen, and Tom J. Guilfoyle. 2004. “Aux/IAA Proteins Contain a  
28 Potent Transcriptional Repression Domain.” *The Plant Cell* 16 (2): 533–43.  
29 doi:[10.1105/tpc.017384](https://doi.org/10.1105/tpc.017384).
- 30 Ulmasov, T., J. Murfett, G. Hagen, and T. J. Guilfoyle. 1997. “Aux/IAA Proteins Repress  
31 Expression of Reporter Genes Containing Natural and Highly Active Synthetic Auxin  
32 Response Elements.” *The Plant Cell Online* 9 (11): 1963–71. doi:[10.1105/tpc.9.11.1963](https://doi.org/10.1105/tpc.9.11.1963).
- 33 Waese, Jamie, Jim Fan, Asher Pasha, Hans Yu, Geoffrey Fucile, Ruian Shi, Matthew Cumming,  
34 et al. 2017. “ePlant: Visualizing and Exploring Multiple Levels of Data for Hypothesis  
35 Generation in Plant Biology.” *The Plant Cell* 29 (8): 1806–21. doi:[10.1105/tpc.17.00073](https://doi.org/10.1105/tpc.17.00073).

- 1 Wagih, Omar. 2017. *Ggseqlogo: A 'Ggplot2' Extension for Drawing Publication-Ready*  
2 *Sequence Logos*. <https://CRAN.R-project.org/package=ggseqlogo>.
- 3 Wang, Wensheng, Ramil Mauleon, Zhiqiang Hu, Dmytro Chebotarov, Shuaishuai Tai,  
4 Zhichao Wu, Min Li, et al. 2018. "Genomic Variation in 3,010 Diverse Accessions of Asian  
5 Cultivated Rice." *Nature* 557 (7703): 43. doi:[10.1038/s41586-018-0063-9](https://doi.org/10.1038/s41586-018-0063-9).
- 6 Weigel, Detlef, and Richard Mott. 2009. "The 1001 Genomes Project for Arabidopsis  
7 Thaliana." *Genome Biology* 10 (5): 107. doi:[10.1186/gb-2009-10-5-107](https://doi.org/10.1186/gb-2009-10-5-107).
- 8 Whitehead, Timothy A, Aaron Chevalier, Yifan Song, Cyrille Dreyfus, Sarel J Fleishman,  
9 Cecilia De Mattos, Chris A Myers, et al. 2012. "Optimization of Affinity, Specificity and  
10 Function of Designed Influenza Inhibitors Using Deep Sequencing." *Nature Biotechnology*  
11 30 (6): 543–48. doi:[10.1038/nbt.2214](https://doi.org/10.1038/nbt.2214).
- 12 Wickham, Hadley. 2016. *Plyr: Tools for Splitting, Applying and Combining Data*.  
13 <https://CRAN.R-project.org/package=plyr>.
- 14 ———. 2017a. *Reshape2: Flexibly Reshape Data: A Reboot of the Reshape Package*.  
15 <https://CRAN.R-project.org/package=reshape2>.
- 16 ———. 2017b. *Tidyverse: Easily Install and Load the 'Tidyverse'*. [https://CRAN.R-](https://CRAN.R-project.org/package=tidyverse)  
17 [project.org/package=tidyverse](https://CRAN.R-project.org/package=tidyverse).
- 18 ———. 2018a. *Forcats: Tools for Working with Categorical Variables (Factors)*.  
19 <https://CRAN.R-project.org/package=forcats>.
- 20 ———. 2018b. *Scales: Scale Functions for Visualization*. [https://CRAN.R-](https://CRAN.R-project.org/package=scales)  
21 [project.org/package=scales](https://CRAN.R-project.org/package=scales).
- 22 ———. 2018c. *Stringr: Simple, Consistent Wrappers for Common String Operations*.  
23 <https://CRAN.R-project.org/package=stringr>.
- 24 Wickham, Hadley, and Lionel Henry. 2018. *Tidyr: Easily Tidy Data with 'Spread()' and*  
25 *'Gather()' Functions*. <https://CRAN.R-project.org/package=tidyr>.
- 26 Wickham, Hadley, Winston Chang, Lionel Henry, Thomas Lin Pedersen, Kohske Takahashi,  
27 Claus Wilke, and Kara Woo. 2018. *Ggplot2: Create Elegant Data Visualisations Using the*  
28 *Grammar of Graphics*. <https://CRAN.R-project.org/package=ggplot2>.
- 29 Wickham, Hadley, Romain François, Lionel Henry, and Kirill Müller. 2018. *Dplyr: A*  
30 *Grammar of Data Manipulation*. <https://CRAN.R-project.org/package=dplyr>.
- 31 Wickham, Hadley, Jim Hester, and Romain Francois. 2017. *Readr: Read Rectangular Text*  
32 *Data*. <https://CRAN.R-project.org/package=readr>.
- 33 Winkler, Martin, Michael Niemeyer, Antje Hellmuth, Philipp Janitza, Gideon Christ, Sophia L.  
34 Samodelov, Verona Wilde, et al. 2017. "Variation in Auxin Sensing Guides AUX/IAA  
35 Transcriptional Repressor Ubiquitylation and Destruction." *Nature Communications* 8  
36 (June): 15706. doi:[10.1038/ncomms15706](https://doi.org/10.1038/ncomms15706).

- 1 Wright, Erik. 2018. *DECIPHER: Tools for Curating, Analyzing, and Manipulating Biological*  
2 *Sequences*.
- 3 Wright, Erik S. 2015. "DECIPHER: Harnessing Local Sequence Context to Improve Protein  
4 Multiple Sequence Alignment." *BMC Bioinformatics* 16 (October): 322.  
5 doi:[10.1186/s12859-015-0749-z](https://doi.org/10.1186/s12859-015-0749-z).
- 6 Wright, R. Clay, Mollye L. Zahler, Stacey R. Gerben, and Jennifer L. Nemhauser. 2017.  
7 "Insights into the Evolution and Function of Auxin Signaling F-Box Proteins in Arabidopsis  
8 Thaliana Through Synthetic Analysis of Natural Variants." *Genetics* 207 (2): 583–91.  
9 doi:[10.1534/genetics.117.300092](https://doi.org/10.1534/genetics.117.300092).
- 10 Wu, Miin-Feng, Nobutoshi Yamaguchi, Jun Xiao, Bastiaan Bargmann, Mark Estelle, Yi Sang,  
11 and Doris Wagner. 2015. "Auxin-Regulated Chromatin Switch Directs Acquisition of Flower  
12 Primordium Founder Fate." *eLife* 4 (October): e09269. doi:[10.7554/eLife.09269](https://doi.org/10.7554/eLife.09269).
- 13 Xie, Yihui. 2018a. *Bookdown: Authoring Books and Technical Documents with R Markdown*.  
14 <https://CRAN.R-project.org/package=bookdown>.
- 15 ———. 2018b. *DT: A Wrapper of the Javascript Library 'Datatables'*. [https://CRAN.R-](https://CRAN.R-project.org/package=DT)  
16 [project.org/package=DT](https://CRAN.R-project.org/package=DT).
- 17 ———. 2018c. *Knitr: A General-Purpose Package for Dynamic Report Generation in R*.  
18 <https://CRAN.R-project.org/package=knitr>.
- 19 Yu, Guangchuang. 2018. *Treeio: Base Classes and Functions for Phylogenetic Tree Input and*  
20 *Output*. <https://guangchuangyu.github.io/software/treeio>.
- 21 Yu, Guangchuang, and Tommy Tsan-Yuk Lam. 2018. *Ggtree: An R Package for Visualization*  
22 *and Annotation of Phylogenetic Trees with Their Covariates and Other Associated Data*.  
23 <https://guangchuangyu.github.io/software/ggtree>.
- 24 Yu, Hong, Yi Zhang, Britney L. Moss, Bastiaan O. R. Bargmann, Renhou Wang, Michael  
25 Prigge, Jennifer L. Nemhauser, and Mark Estelle. 2015. "Untethering the Tir1 Auxin  
26 Receptor from the SCF Complex Increases Its Stability and Inhibits Auxin Response."  
27 *Nature Plants* 1 (3): 14030. doi:[10.1038/nplants.2014.30](https://doi.org/10.1038/nplants.2014.30).
- 28 Zhou, Zhengkui, Yu Jiang, Zheng Wang, Zhiheng Gou, Jun Lyu, Weiyu Li, Yanjun Yu, et al.  
29 2015. "Resequencing 302 Wild and Cultivated Accessions Identifies Genes Related to  
30 Domestication and Improvement in Soybean." *Nature Biotechnology* 33 (4): 408–14.  
31 doi:[10.1038/nbt.3096](https://doi.org/10.1038/nbt.3096).
